# Differential Cerebral Cortex Transcriptomes of Baboon Neonates Consuming Moderate and High Docosahexaenoic Acid Formulas

Kumar S. D. Kothapalli<sup>1</sup>, Joshua C. Anthony<sup>2</sup>, Bruce S. Pan<sup>1</sup>, Andrea T. Hsieh<sup>1</sup>, Peter W. Nathanielsz<sup>3</sup>, J. Thomas Brenna<sup>1\*</sup>

<sup>1</sup> Division of Nutritional Sciences, Cornell University, Savage Hall, Ithaca, New York, United States of America, <sup>2</sup> Mead Johnson and Company, Evansville, Indiana, United States of America, <sup>3</sup> Center for Pregnancy and Newborn Research, University of Texas Health Science Center, San Antonio, Texas, United States of America

**Background.** Docosahexaenoic acid (DHA, 22:6n-3) and arachidonic acid (ARA, 20:4n-6) are the major long chain polyunsaturated fatty acids (LCPUFA) of the central nervous system (CNS). These nutrients are present in most infant formulas at modest levels, intended to support visual and neural development. There are no investigations in primates of the biological consequences of dietary DHA at levels above those present in formulas but within normal breastmilk levels. **Methods and Findings.** Twelve baboons were divided into three formula groups: Control, with no DHA-ARA; "L", LCPUFA, with 0.33%DHA-0.67%ARA; "L3", LCPUFA, with 1.00%DHA-0.67%ARA. All the samples are from the precentral gyrus of cerebral cortex brain regions. At 12 weeks of age, changes in gene expression were detected in 1,108 of 54,000 probe sets (2.05%), with most showing <2-fold change. Gene ontology analysis assigns them to diverse biological functions, notably lipid metabolism and transport, G-protein and signal transduction, development, visual perception, cytoskeleton, peptidases, stress response, transcription regulation, and 400 transcripts having no defined function. *PLA2G6*, a phospholipase recently associated with infantile neuroaxonal dystrophy, was downregulated in both LCPUFA groups. *ELOVL5*, a PUFA elongase, was the only LCPUFA biosynthetic enzyme that was differentially expressed. Mitochondrial fatty acid carrier, *CPT2*, was among several genes associated with mitochondrial fatty acid oxidation to be downregulated by high DHA, while the mitochondrial proton carrier, *UCP2*, was upregulated. *TIMM8A*, also known as deafness/dystonia peptide 1, was among several differentially expressed neural development genes. *LUM* and *TIMP3*, associated with corneal structure and age-related macular degeneration, respectively, were among visual perception genes influenced by LCPUFA. *TIA1*, a silencer of *COX2* gene translation, is upregulated by high DHA. Ingenuity pathway analysis identified a highly significant nervous system network, with epidermal growth factor receptor (*EGFR*) as the outstanding interaction partner. **Conclusions.** These data indicate that LCPUFA concentrations within the normal range of human breastmilk induce global changes in gene expression across a wide array of processes, in addition to changes in visual and neural function normally associated with formula LCPUFA.

Citation: Kothapalli KSD, Anthony JC, Pan BS, Hsieh AT, Nathanielsz PW, et al (2007) Differential Cerebral Cortex Transcriptomes of Baboon Neonates Consuming Moderate and High Docosahexaenoic Acid Formulas. PLoS ONE 2(4): e370. doi:10.1371/journal.pone.0000370

## INTRODUCTION

The vertebrate central nervous system (CNS) is rich in the long chain polyunsaturated fatty acids (LCPUFA) docosahexaenoic acid (DHA) and arachidonic acid (ARA), and this composition is highly conserved across species[1]. Within the CNS, DHA and ARA are found at highest concentration in gray matter[2], and DHA is particularly concentrated in retinal photoreceptor membranes where it has long been known to play a key role in visual excitation[3]. In humans, DHA and ARA accumulate perinatally[4] and many studies of DHA/ARA supplemented formula show improvements in visual acuity[5] and cognitive function[6].

Despite the high demand for LCPUFA during perinatal CNS development, the best current evidence indicates that ARA and DHA can be synthesized only very inefficiently from dietary precursors and must be obtained from the diet[7]. DHA and ARA are present in all human milks studied to date[8], however their concentration is variable. For DHA it is closely linked to the mother's intake of preformed DHA, which is in turn reflective of the mother's intake of fatty fish or fish/marine oil supplements[9,10,11,12]. Dietary factors associated with ARA are less well understood[13]. High levels of precursor fatty acids LA and ALA in formulas yield negligible or at most moderate increases in plasma ARA and DHA concentrations[14,15]. However, in randomized controlled studies where preterm and term infants are fed preformed DHA and ARA supplemented formula, improve-

ments in LCPUFA status as well as cognitive development and visual functions are observed [16,17,18,19,20].

While the importance of LCPUFA in infant nutrition has been established, the underlying mechanisms are only beginning to be understood. Brain accretion of LCPUFA is most intense during the brain growth spurt in the third trimester of pregnancy and during early childhood[21,22,23,24]. Selective incorporation and functional properties of LCPUFA, especially DHA, in retinal and neural membranes suggests a specific role in the modulation of protein-lipid interactions, membrane bound receptor function, membrane permeability, cell signaling, regulation of gene

**Academic Editor:** Schahram Akbarian, University of Massachusetts, United States of America

**Received** February 12, 2007; **Accepted** March 20, 2007; **Published** April 11, 2007

**Copyright:** © 2007 Kothapalli et al. This is an open-access article distributed under the terms of the Creative Commons Attribution License, which permits unrestricted use, distribution, and reproduction in any medium, provided the original author and source are credited.

**Funding:** Mead Johnson and Company, Evansville, IN. BSP acknowledges support from NIH Training Grant DK07158.

**Competing Interests:** Author JCA is an employee of Mead Johnson.

\* **To whom correspondence should be addressed.** E-mail: jtb4@cornell.edu

expression and neuronal growth [25,26,27,28,29,30]. Additionally, LCPUFA mediate metacrine regulation and changes in gene expression by interacting with nutrient sensitive transcription factors [18,31]. Accordingly, poor nutrition during prenatal life and early infancy may have a lasting influence on neural function, as well as adult risk for chronic diseases [32,33,34]. Studies suggest that infant diets low in LCPUFA can lead to health complications such as insulin resistance, obesity, or blood pressure changes later in life [35,36].

DHA and ARA were introduced in 2002 to infant formulas in the United States, but initial concentrations varied over more than a factor of two (range of DHA 8-19 mg/kcal; ARA 21-34 mg/kcal), [37] and there are no dose response studies in humans or non-human primates available as a guide to optimal levels. A previous study in our laboratory on 4-week-old baboon neonates with preformed DHA and ARA (0.33%,w/w DHA and 0.67% ARA) in formulas showed DHA concentrations in various regions of the brain similar to breastfed controls, with the important exception of the cerebral cortex; ARA concentrations were not much altered by inclusion of dietary preformed ARA[2]. These results inspired our present study on 12 week old baboon neonates with the higher level of 1.00% DHA, along with 0.67% ARA. We report elsewhere [38] that DHA in the precentral gyrus of cerebral cortex increased beyond that achieved for 0.33% DHA, while regions such as the basal ganglia that reached DHA concentrations similar to breastfed animals at 0.33% DHA did not show further increases with 1.00% DHA. These data demonstrate that formula DHA in the high normal range of breastmilk DHA supports enhanced cortex DHA, but do not reveal how this compositional change may influence metabolic function.

To gather mechanistic information on the role of DHA and ARA in the primate cerebral cortex, we investigated global gene expression for cerebral cortex of animals in this study, consuming two different levels of formula DHA both within the range found in human breastmilk[8]. We report here changes in expression of thousands of genes in 12-week-old baboons in response to two different levels of LCPUFA: 0.33%DHA and 0.67% ARA; 1.00% DHA and 0.67% ARA. We have reported in detail on consequences for tissue fatty acid composition [38] and other factors elsewhere (Hsieh et al., 2007, submitted).

## RESULTS AND DISCUSSION

Significance analysis ( $P < 0.05$ ) identified changes in expression levels of 1108 probe sets (ps) for comparisons of L3/C and/or L/C, representing 2.05% of the total >54,000 ps on the oligoarray. Most ps showed <2-fold change. For the L/C comparisons, 534 ps were upregulated, and 574 ps were downregulated, while for the L3/C comparisons, 666 ps were upregulated and 442 ps were downregulated, showing that more genes were upregulated in the cerebral cortex in response to increasing formula ARA and DHA. Functional characterization by gene ontology of these differentially regulated genes assigns them to diverse biological processes including lipid and other metabolism, ion channel and transport, development, visual perception, G-protein and signal transduction, regulation of transcription, cell cycle, cell proliferation, apoptosis etc. Known functions were assigned to 702 differentially expressed probe sets, whereas 406 ps had no known functions as shown in Table S1A, S1B, S1C, S1D. Probe sets with  $\geq 1.4$  fold expression change are presented in Table S2. Experimental details for nine genes used for confirmatory RT-PCR analysis are presented in Table S3. We note that in our L/C and L3/C comparisons, expression patterns fall into four groups, L/C and L3/C both upregulated and both downregulated, or one upregulated and one downregulated. Because the L and L3 groups

have the same amount of ARA but different amounts of DHA, our treatments do not strictly represent a DHA dose response. The L/C comparison corresponds to inclusion of DHA and ARA at current levels near the worldwide breastmilk means, while the L3 group corresponds to DHA near the worldwide high [8].

Nine genes were tested by quantitative real time PCR to confirm the array results, as shown in Table S4. All were qualitatively consistent with the gene array results.

We highlight results in several categories of gene ontology as follows.

### Lipid (fatty acid and cholesterol) Metabolism

Table 1 presents results from genes related to lipid metabolism that are regulated by dietary LCPUFA.

Genes related to phospholipids biosynthesis (*PLA2G6* and *DGKE*) were differentially expressed. *PLA2G6* was downregulated in both groups. This gene codes for the Ca-independent cytosolic phospholipase A2 Group VI. Alterations in this gene have very recently been implicated as a common feature of neurodegener-

**Table 1. Lipid and energy metabolism gene fold-changes in expression profiles.**

| Metabolism                    | Gene Symbol    | Unigene ID   | L         | L3    |
|-------------------------------|----------------|--------------|-----------|-------|
| Lipid                         | <i>ATP8B1</i>  | Hs.569910    | 1.28      | 1.36  |
|                               | <i>PDE3A</i>   | Hs.386791    | 1.08      | 1.30  |
|                               | <i>ELOVL5</i>  | Hs.520189    | -1.02     | 1.11  |
|                               | <i>ACSL3</i>   | Hs.471461    | -1.13     | 1.08  |
|                               | <i>HNF4A</i>   | Hs.116462    | 1.06      | -1.16 |
|                               | <i>CLPS</i>    | Hs.1340      | 1.02      | -1.16 |
|                               | <i>ALDH3B2</i> | Hs.87539     | 1.05      | -1.16 |
| Fatty acid oxidation          | <i>PLCE1</i>   | Hs.20022     | -1.10     | -1.19 |
|                               | <i>ACADSB</i>  | Hs.81934     | -1.10     | 1.38  |
|                               | <i>ACAD10</i>  | Hs.331141    | -1.08     | 1.10  |
|                               | <i>GLYAT</i>   | Hs.274336    | 1.01      | 1.30  |
|                               | <i>ADH5</i>    | Hs. 78989    | 1.03      | 1.22  |
| Energy                        | <i>CPT2</i>    | Hs.145384    | 1.10      | -1.22 |
|                               | <i>LEP</i>     | Hs.194236    | -1.01     | 1.17  |
|                               | Ceramide       | <i>NSMAF</i> | Hs.372000 | -1.04 |
| <i>LASS5</i>                  |                | Hs.270525    | 1.06      | 1.11  |
| Glycosphingolipid             | <i>SPTLC2</i>  | Hs.435661    | 1.27      | 1.40  |
| Steroid                       | <i>OSBP2</i>   | Hs.517546    | -1.17     | 1.35  |
|                               | <i>UGT2B15</i> | Hs.150207    | 1.04      | 1.21  |
|                               | <i>SULT2B1</i> | Hs.369331    | 1.04      | -1.38 |
| Phospholipid                  | <i>DGKE</i>    | Hs.546318    | -1.10     | 1.17  |
|                               | <i>PLA2G6</i>  | Hs.170479    | -1.09     | -1.20 |
| Prostaglandin and Leukotriene | <i>TEBP</i>    | Hs.50425     | 1.02      | 1.52  |
|                               | <i>ANXA3</i>   | Hs.480042    | 1.26      | -1.04 |
|                               | <i>LTC4S</i>   | Hs.456       | -1.33     | -1.24 |
| Cholesterol                   | <i>DHCR24</i>  | Hs.498727    | -1.18     | 1.17  |
|                               | <i>PRKAG2</i>  | Hs.131133    | -1.07     | 1.09  |
|                               | <i>PRKAA1</i>  | Hs.43322     | 1.09      | -1.02 |
|                               | <i>SOAT1</i>   | Hs.496383    | -1.09     | -1.12 |
|                               | <i>FDFT1</i>   | Hs.546253    | 1.01      | -1.13 |

doi:10.1371/journal.pone.0000370.t001

ative disorders involving iron accumulation [39], as well as the underlying factor in infantile neuroaxonal dystrophy, a neurodegenerative disorder caused by accumulation of iron in the globus pallidus and resulting in death by age 10[40]. In a previous study of four week old breastfed baboons, the globus pallidus was found to have  $15.8 \pm 0.5\%$  DHA (w/w of total fatty acids) and was the richest in DHA of 26 CNS regions examined[2]. The globus pallidus is also rich in ARA, with  $10.3\%$  (w/w) in four week old baboons. PLA2 are a superfamily of enzymes that liberate fatty acids from the sn-2 position of phospholipids; in the globus pallidus DHA and ARA are the most abundant acyl groups at this site.

Remarkably, among the elongation and desaturation enzymes associated with LCPUFA synthesis, only a single elongation enzyme was differentially expressed. The human *ELOVL5* transcript was downregulated slightly in the L/C group and upregulated in the L3/C group. This enzyme, also called *HELO1*, catalyzes the two carbon elongation of polyunsaturated 18 and 20 carbon fatty acids [41,42].

We also found that *DGKE* was upregulated in the L3/C comparison. Genes involved in ceramide metabolism (*NSMAF*, *LASS5*), glycosphingolipid metabolism (*SPTLC2*) and steroid metabolism (*OSBP2*, *UGT2B15*) showed increased expression in L3/C group, whereas *NSMAF* and *OSBP2* were downregulated in L/C group.

The best studied role of ARA is as a precursor for eicosanoids including prostaglandins, leukotrienes, and thromboxanes. One of the genes derived from membrane-bound ARA, which catalyze the first step in the biosynthesis of cysteinyl leukotrienes, Leukotriene C4 synthase (*LTC4S*), is downregulated in both DHA-ARA groups. *LTC4S* is a potent proinflammatory and anaphylactic mediator [43]. An elevated level of mRNA for *PGES3* (prostaglandin E synthase 3) was observed in both the groups. *PGES3* is also known as *TEBP* (telomerase-binding protein p23) or inactive progesterone receptor, 23-KD (*p23*). *p23*, a ubiquitous highly conserved protein which functions as a co-chaperone for the heat shock protein, *HSP90*, participates in the folding of a number of cell regulatory proteins [44,45]. *p23* has been demonstrated to bind to human telomerase reverse transcriptase (hTERT) and contribute to telomerase activity [46]. Decreased levels of Annexin A3 (*ANXA3*) also known as Lipocortin III was observed with increasing DHA.

Genes involved in fatty acid oxidation (*ACADSB*, *ACAD10* and *GLYAT*) were upregulated, and carnitine palmitoyltransferase II (*CPT2*) downregulated, in the L3/C group. ACADs (acyl-CoA dehydrogenases) are a family of mitochondrial matrix flavoproteins that catalyze the dehydrogenation of acyl-CoA derivatives and are involved in the  $\beta$ -oxidation and branched chain amino acid metabolism [47,48]. Both the ACADs family members *ACADSB* and *ACAD10* were upregulated in L3/C group, consistent with greater energy production in the high DHA group. Mitochondrial-specific *GLYAT* (glycine-N-acyltransferase) also known as acyl CoA:glycine N-acyl transferase (*ACGNAT*), conjugates glycine with acyl-CoA and participates in detoxification of various drugs and xenobiotics [49,50]. Mawal et al [50] suggested that delayed development of *GLYAT* might impair detoxification process in children.

Genes involved in cholesterol biosynthesis, *DHCR24*, *PRKAG2*, *PRKAA1*, *SOAT1*, and *FDFT1* showed significant associations with LCPUFA levels. Increasing DHA upregulated *DHCR24* and *PRKAG2*, downregulated *PRKAA1*, *SOAT1* and *FDFT1*. *DHCR24* (24-dehydrocholesterol reductase) also known as selective AD indicator 1 (*SELADIN1*) catalyzes the reduction of the delta-24 double bond of sterol intermediates during cholesterol biosynthesis [51]. *SELADIN1* may activate estrogen receptor in the brain and protect from beta-amyloid-mediated toxicity [52]. Decreased expression of *SELADIN1* is observed in brain regions of patients with Alzheimer's

disease [53]. *PRKAG2* (protein kinase, AMP-activated, gamma 2) is a member of AMP-activated protein kinase (AMPK) family. AMPKs perform multifunctional roles in calcium signaling, weight loss, regulation of energy metabolism in heart [54,55,56].

*SOAT1* (sterol O-acyl transferase) or Acyl-coenzyme A: cholesterol acyl transferase (*ACAT*) is an intracellular protein which catalyzes the formation of cholesterol esters in endoplasmic reticulum and is involved in lipid droplets that are characteristic of foam cells of atherosclerotic plaques [57,58,59].

Increased expression was detected for *ATP8B1*, *PDE3A* in both groups, comparatively more in L3/C, while transcripts involving *HNF4A* (Hepatic nuclear factor-4 $\alpha$ ), *CLPS* and *ALDH3B2* showed decreased expression with increasing DHA. Intrahepatic cholestasis, or impairment of bile flow, is an important manifestation of inherited and acquired liver disease resulting in hepatic accumulation of the toxic bile acids and progressive liver damage. Bile acids enhance efficient digestion and absorption of dietary fats and fat-soluble vitamins, and are the main route for excretion of sterols. Expression of *ATP8B1* is high in the small intestine, and mutations in *ATP8B1* gene have been linked to intrahepatic cholestasis [60,61]. *ATP8B1* expression was confirmed by real time PCR (Table S4). *PDE3A* (phosphodiesterase 3A, cGMP-inhibited) is a 120 kDa protein found in myocardium and platelets [62]. Ding et al[63] showed significantly decreased expression of *PDE3A* in the left ventricles of failing human hearts. *PDE3A* expression is required for the regulation of penile erection in humans [64].

Leptin (*LEP*), which has a role in energy metabolism, was upregulated in L3/C group. Leptin is a secreted adipocyte hormone that plays a pivotal role in the regulation of food intake and energy homeostasis [65,66]. Leptin suppresses feeding and decreases adiposity in part by inhibiting hypothalamic Neuropeptide Y synthesis and secretion [67,68].

### Ion Channel and Transport

Expression levels of transcripts involved in ion channel and transporter activity were altered by dietary LCPUFA (Table S5). Uncoupling protein 2, *LOC131873* (hypothetical protein) and *ATP11C*, which have ion channel activity, are upregulated in both the groups but more so in L3/C. Other transcripts with ion channel activity, including *VDAC3*, *FTH1*, *KCNK3*, *KCNH7* and *TRPM1* were upregulated in L3/C group and downregulated in L/C. *GLRA2*, *TRPV2* and *HFE* are upregulated in L/C and repressed in L3/C. *P2RX2*, *GRIA1* and *CACNA1S* are repressed in both the groups.

One of our significant observations is the increased expression of uncoupling protein 2 (*UCP2*), a mitochondrial, proton carrier. Our data shows, for the first time, increased expression of *UCP2* in neonatal cerebral cortex associated with dietary LCPUFA; increased expression is observed in both the groups but more in L3/C. QRT-PCR confirmed the array results (Table S4). Nutritional regulation and induction of mitochondrial uncoupling proteins resulting from dietary n3-PUFA in skeletal muscle and white adipose tissue have been observed [69,70]. Increased *UCP2* expression is beneficial in diseases associated with neurodegeneration, cardiovascular and type 2 diabetes[71]. Dietary fats in milk increased the expression and function of *UCP2* in neonatal brain and protected neurons from excitotoxicity [72].

*VDAC3* (voltage-dependent anion channel 3) belongs to a group of pore forming proteins found in the outer mitochondrial membrane and in brain synaptic membranes [73,74]. Massa et al [75] observed a significant reduction of *VDAC3* mRNA levels in the skeletal muscle and brains of dystrophin-deficient mdx mice during postnatal development. Mice lacking *VDAC3* exhibit infertility [76]. All the transcripts (*VDAC3*, *KCNK3* and *KCNH7*)

having voltage-gated anion channel porin activity were upregulated with increasing DHA. *FTH1* (Ferritin heavy chain 1) is required for iron homeostasis and it has been previously shown to be expressed in human brain [77].

Genes encoding small molecule transporters were differentially expressed, including carriers of glucose (*SLC2A1*, *SLC5A4*), chloride (*SLC12A6*), sodium (*SLC13A3*), monoamine (*SLC18A2*) and others (*SLC26A4*, *SLC17A6*). These transporters might help in exchange of nutrients and metabolites. Members of the cytochrome P and B family of proteins were also differentially expressed. Transcripts encoding *VDP*, *RSAFD1*, *C1QG* and *OXA1L* were significantly repressed by increasing DHA.

## G-Proteins and Signaling

Numerous genes encoding G-protein activity were differentially regulated (Table S5), and the majority were induced by high DHA. *GNA13*, *GNA14*, *PTHR2*, *RCP9* and *FZD3* showed increased expression in both DHA groups. *EDG7*, *SH3TC2*, *GNRHR*, *ADRA1A*, *BLR1*, *GPR101*, *GPR20* and *OR8G2* were downregulated in L/C and upregulated in L3/C. *NPY1R* is downregulated in both the groups.

DHA regulates G-protein signaling in the brain and retina [78]. G-proteins are membrane-associated proteins which promote exchange of GTP for GDP and regulate signal transduction and membrane traffic[79]. *GNA13* deficiency impairs angiogenesis in mice [80] while *GNA14* activates the NF- $\kappa$ B signaling cascade [81]. Parathyroid hormone receptor 2 (*PTHR2*) is activated by parathyroid hormone and is relatively abundant in the CNS [82,83]. *RCP9*, also known as calcitonin gene-related peptide-receptor component protein, may have a role during hematopoiesis [84]. Tissir and Goffinet [85] showed expression of *FZD3* during postnatal CNS development in mice. *FZD3* array results were confirmed by SYBR green real time PCR assay (Table S4).

Neuropeptide Y is a 36-amino acid peptide with strong orexigenic effects *in vivo* [86]. Two major subtypes of NPY (Y1 and Y2) have been defined by pharmacologic criteria. *NPY1R* was suggested to be unique for the control of feeding [87]. Pedrazzini et al [88] observed a moderate but significant decrease in food intake in mice lacking the *NPY1R* gene.

*EDG7* (endothelial differentiation, lysophosphatidic acid G-protein-coupled receptor, 7) mediates calcium mobilization[89]. Mutation in the *SH3TC2* gene causes childhood-onset of a neurodegenerative disorder affecting motor and sensory neurons[90].

Several signaling proteins (*NFI*, *WSB1*, *SOC3A*, *RIT1*, *CD8B1*, *OR2A9P* and *RERG*) were upregulated in both groups. Genes that are upregulated in L3/C and downregulated in L/C were also observed, specifically *PDE4D*, *KRAS*, *ITGA2*, *PLCXD3*, *WNT8A*, *ARHGAP4*, *RAPGEF6*, *OR2F1/OR2F2*, *CCM1* and *SFRP2*, while a few genes (*WNT10A*, *ADCY2*, *OGT*, *DDAH1* and *BCL9*) were upregulated in L/C and downregulated in L3/C. *IQGAP3*, *GCCR*, *APLN*, *CYTL1*, *GRP*, *LPHN3*, *CNRI*, *VAV3* and *MCF2* were downregulated in both the groups (Table S5).

*NFI* is a tumor-suppressor gene; mutations in this gene cause neurocutaneous defects [91]. *NFI* gene expression and function are needed for normal fracture healing [92]. *NFI* expression levels were confirmed by QRT-PCR (Table S4). *WSB1* is a SOCS-box-containing WD-40 protein expressed during embryonic development in chicken [93]. RAS and RAS related gene families of small GTPases (*RIT1*, *KRAS*, *RERG* and *RAPGEF6*) were upregulated by increasing DHA.

Diets deficient in n-3 PUFA induce substitution of n-6 DPA (22:5n-6) in neural membranes, and impairment of functions mediated by G protein mediated signaling, such as visual perception, learning and memory, and olfactory discrimination. Abun-

dant evidence indicates that this results in reduced rhodopsin activation, and signaling in rod outer segments compared to DHA-replete animals[78,94,95,96,97].

## Development

Table 2 shows differential expression of 24 genes related to development. The products of 11 transcripts play a role in nervous system development. The expression of *TIMM8A*, *NRG1*, *SEMA3D* and *NUMB* genes were upregulated in both L/C and L3/C groups. *HES1* and *SIM1* were downregulated in both the groups. *GDF11*, *SMA3/SMA5*, *SH3GL3* were downregulated in L/C and upregulated in L3/C. The mRNA levels of growth factors *FGF5* and *FGF14* displayed increased abundance in L/C and decreased abundance in L3/C.

*TIMM8A* also known as Deafness/Dystonia Peptide 1 (*DDP1*) is a well conserved protein organized in mitochondrial intermembrane space. Loss-of-Function mutations in the *TIMM8A* gene cause Mohr-Tranebjaerg syndrome (a progressive neurodegenerative disorder with deafness, blindness, dystonia and mental deficiency) and Jensen syndrome (opticoacoustic nerve atrophy with dementia) [98,99,100]. TaqMan assay confirmed the array results (Table S4). *NRG1* is essential for the development and function of the CNS facilitating the neuronal migration and axon guidance [101,102]. *NUMB* negatively regulates notch signaling and plays a role in retinal neurogenesis, influencing the proliferation and differentiation of retinal progenitors and maturation of postmitotic

**Table 2. Development gene fold-changes in expression profiles.**

| Development           | Gene Symbol       | Unigene ID                  | L      | L3    |
|-----------------------|-------------------|-----------------------------|--------|-------|
| Nervous system        | <i>TIMM8A</i>     | Hs.447877                   | 1.04   | 1.57  |
|                       | <i>NRG1</i>       | Hs.453951                   | 1.02   | 1.21  |
|                       | <i>SEMA3D</i>     | Hs.201340                   | 1.10   | 1.14  |
|                       | <i>NUMB</i>       | Hs.585653                   | 1.01   | 1.10  |
|                       | <i>HES1</i>       | Hs.250666                   | -1.30  | -1.63 |
|                       | <i>SIM1</i>       | Hs.520293                   | -1.16  | -1.16 |
|                       | <i>GDF11</i>      | Hs.591023                   | -1.18  | 1.09  |
|                       | <i>SMA3//SMA5</i> | Hs.482414/484969/<br>588240 | -1.08  | 1.06  |
|                       | <i>SH3GL3</i>     | Hs.270055/458285            | -1.16  | 1.04  |
|                       | <i>FGF5</i>       | Hs.37055                    | 1.08   | -1.20 |
|                       | <i>FGF14</i>      | Hs.591206                   | 1.01   | -1.10 |
| Muscle                | <i>C6orf97</i>    | Hs.130239                   | -1.03  | 1.34  |
|                       | <i>CALD1</i>      | Hs.490203                   | 1.09   | 1.14  |
| Skeletal              | <i>BAPX1</i>      | Hs.105941                   | 1.05   | 1.08  |
| Heart                 | <i>GATA4</i>      | Hs.243987                   | -1.02  | 1.22  |
| Epidermis             | <i>S100A7</i>     | Hs.112408                   | -1.06  | 1.27  |
|                       | <i>FGF7</i>       | Hs.122006                   | 1.14   | 1.02  |
|                       | <i>SCEL</i>       | Hs.115166                   | -1.01  | -1.13 |
| Ectoderm/<br>Mesoderm | <i>SMURF1</i>     | Hs.189329                   | 1.15   | 1.32  |
|                       | <i>TCF21</i>      | Hs.78061                    | -1.12  | -1.18 |
| Gametogenesis         | <i>OTEX</i>       | Hs.196956                   | 1.09   | 1.24  |
|                       | <i>TCP11</i>      | Hs.435371                   | -1.02  | 1.08  |
|                       | <i>CDV1</i>       | Hs.528382                   | -1.001 | -1.10 |
|                       | <i>SPAG6</i>      | Hs.527698                   | -1.03  | -1.22 |

doi:10.1371/journal.pone.0000370.t002

neurons [103]. *HES1* (Hairy/Enhancer of Split, Drosophila, Homolog of, 1) a basic helix-loop-helix protein is downregulated. Decreased expression of *HES1* is observed as neurogenesis proceeds and in case of persistent expression differentiation of neuronal cells are blocked in the CNS [104].

**Visual Perception**

Nine transcripts having a role in visual perception were differentially expressed (Table 3). Genes coding for *LUM*, *EML2*, *TIMP3* and *TTC8* were upregulated in both the supplement groups. *IMPG1* was upregulated in L3/C and downregulated in L/C. *RGS16* and *TULP2* were upregulated in L/C and downregulated in L3/C. *RAX* and *IMPDH1* were downregulated in both the supplement groups.

Lumican (*LUM*), is an extracellular matrix glycoprotein and a member of the small-leucine-rich-proteoglycan (SLRP) family [105]. It is widely distributed in the corneal stroma and connective tissues [106]. Lumican helps in the establishment of corneal stromal matrix organization during neonatal development in mice. Those lacking lumican exhibit several corneal related defects [107]. It is important for corneal transparency in mice [108]. TaqMan assay showed 5-fold more upregulation of *LUM* more than the microarray data (Table S4). Mutations in *TIMP3* gene result in autosomal dominant disorder Sorsby’s fundus dystrophy an age-related macular degeneration of retina [109]. Clarke et al [110] suggested that a possible mechanism for retinal degeneration in Sorsby’s fundus dystrophy was traceable to nutrition.

*IMPG1* is a proteoglycan which participates in retinal adhesion and photoreceptor survival [111]. Higher amounts of DHA in the infant formula increased the expression of *IMPG1*. Expression of *RAX* transcript is decreased in both the supplement groups. Increased *RAX* expression is seen in the retinal progenitor cells during the vertebrate eye development and is downregulated in the differentiated neurons [112,113]. DHA is well known to promote neurite growth in the brain [30]; this could be the possible reason for *RAX* downregulation in our study.

**Integral to Membrane/Membrane Fraction**

Transcripts that are integral part of biological membranes or within the membrane fractions were differentially expressed (Table

S5). *EVER1*, *PERP*, *Cep192*, *SSFA2*, *LPAL2*, *TMEM20*, *TM6SF1* were upregulated in both the groups. *ORMDL3*, *SEZ6L*, *HYDIN*, *TA-LRRP*, *PKD1L1* were upregulated in L3/C and downregulated in L/C. *MFAP3L* was upregulated in L/C and downregulated in L3/C. Transcripts of *GP2* and *SYNGR2* were downregulated in both the groups.

Numbers of transcripts were upregulated by increased DHA in the formulas. LCPUFA can affect biological membrane functions by influencing membrane composition and permeability, interaction with membrane proteins, membrane-bound receptor function, photoreceptor signal transduction and transport [114,115,116]. Mutations in *EVER1* or transmembrane channel-like 6 (*TMC6*) gene cause epidermodysplasia verruciformis, a type of skin disorder [117]. *HYDIN* is a novel gene and nearly-complete loss of its function due to mutations causes congenital hydrocephalus in mice [118]. The exact function of *GP2* is unknown, but it has been associated with the secretory granules in the pancreas [119].

**Programmed Cell Death/Apoptosis**

Transcripts with apoptotic activity were differentially expressed (Table S5). Seven out of nine transcripts in our study were upregulated with increasing DHA, including *CARD6*, *TIA1*, *BNIP1*, *FAF1*, *GULP1*, *CASP9* and *FLJ13491*. Programmed cell death (PCD) plays an important role during the development of immune and nervous systems [120]. Jacobson et al [121] proposed PCD as an important event in eliminating unwanted cells during development. Mice with targeted deletion of *CASP3* die perinatally due to vast excesses of cells deposition in their CNS as a result of decreased apoptotic activity [120]. *CARD6* (caspase recruitment domain protein 6) is upregulated in both the groups. It is a microtubule-interacting protein that activates NF- $\kappa$ B and takes part in the signaling events leading to apoptosis [122]. *TIA1* is upregulated in L3/C and downregulated in L/C. *TIA1* is a member of RNA-binding protein family with pro-apoptotic activity, and it silences the translation of cyclooxygenase-2 (*COX2*). Narayanan et al, [123] suggested that DHA indirectly increases the expression of genes which downregulate *COX2* expression. The *COX2* enzyme catalyzes the rate-limiting step for prostaglandin production, which influence many processes including inflammation [124]. Downregulation of *TIA1* in L/C could be due to the influence of ARA, the major *COX2* substrate, rather than that of DHA which is a competitive inhibitor. *GULP1* assists in efficient removal of the apoptotic cells by phagocytosis [125]. *CASP9* activates caspase activation cascade and is an important component of mitochondrial apoptotic pathway [126].

**Cytoskeleton and Cell adhesion**

Dietary LCPUFA regulated expression of several transcripts involved in cytoskeleton and cell adhesion (Table S5). The expression of 27 ps involved in cytoskeleton was altered. *MYO1A* and *MYO5A* were upregulated with increasing amounts of DHA whereas *MYO1E* showed decreased expression. Myosin-1 isoforms are membrane associated molecular motors which play essential roles in membrane dynamics, cytoskeletal structure and signal transduction [127]. *COLAA6* and *COL9A3* showed increased expression whereas *COLAA2* and *COL9A2* showed decreased expression with increasing DHA. Type IV collagen is the major component of the basement membrane. Mild forms of Alport nephropathy is associated with deletion in *COL4A6* gene [128] and eye abnormalities are common in people afflicted with Alport syndrome [129]. *WASL*, also known as neural WASP (*WASP*), was upregulated in both the groups. Actin cytoskeleton regulation is vital for brain development and function. *WASL* is an actin-

**Table 3.** Visual perception gene fold-changes in expression profiles.

| Gene Product                                                     | Unigene ID | L     | L3    |
|------------------------------------------------------------------|------------|-------|-------|
| Lumican ( <i>LUM</i> )                                           | Hs.406475  | 1.03  | 1.30  |
| Interphotoreceptor matrix proteoglycan 1 ( <i>IMPG1</i> )        | Hs.590893  | -1.03 | 1.18  |
| Echinoderm microtubule associated protein like 2 ( <i>EML2</i> ) | Hs.24178   | 1.07  | 1.15  |
| TIMP metalloproteinase inhibitor 3 ( <i>TIMP3</i> )              | Hs.297324  | 1.28  | 1.05  |
| Tetratricopeptide repeat domain 8 ( <i>TTC8</i> )                | Hs.303055  | 1.10  | 1.01  |
| IMP (inosine monophosphate) dehydrogenase 1 ( <i>IMPDH1</i> )    | Hs.534808  | -1.20 | -1.12 |
| Tubby like protein 2 ( <i>TULP2</i> )                            | Hs.104636  | 1.07  | -1.15 |
| Retina and anterior neural fold homeobox ( <i>RAX</i> )          | Hs.278957  | -1.10 | -1.24 |
| Regulator of G-protein signalling 16 ( <i>RGS16</i> )            | Hs.413297  | 1.01  | -1.26 |

doi:10.1371/journal.pone.0000370.t003

regulating protein and mediates filopodium formation [130,131,132]. *HIP1* (huntingtin interacting protein 1) and *HOOK2* (hook homolog 2) were downregulated in both the groups.

The expression levels of 15 transcripts involved in cell adhesion changed as a result of dietary LCPUFA (Table S5). *BTBD9*, *CD44*, *ARM4*, *CD58*, *LOC389722* and *PCDHB13* showed increased expression in both the groups. Glycoprotein *CD44* is a cell-surface adhesion molecule that is involved in cell-cell and cell-matrix interactions [133] while *PCDHB13* is a member of protocadherin beta family of transmembrane glycoproteins [134]. *NLGN3* and *CYR61* were downregulated in both groups.

## Peptidases

Several transcripts having peptidase activity were differentially expressed (Table S5). *SERPINB6* is significantly upregulated in L3/C and downregulated in L/C. Of note, the ADAM families of proteins (*ADAM17*, *ADAM33*, and *ADAMTS16*) were upregulated and *ADAMTS15* was downregulated in both the supplement groups. ADAM proteins are membrane-anchored glycoproteins named for two of the motifs they carry: an adhesive domain (disintegrin) and a degradative domain (metalloprotease) [135]. These proteins are involved in several biological processes including cell-cell interactions, heart development, neurogenesis and muscle development [136,137,138,139]. *ADAM17* is required for proteolytic processing of other proteins and have been reported to participate in cleaving of the amyloid precursor protein [140,141]. Loss of *ADAM17* is reported in abnormalities associated with heart, skin, lung and intestines [142,143,144]. Real time PCR confirmed array results of *ADAM17* (Table S4). *ADAM33* has been recently implicated as an asthma and bronchial hyperresponsiveness gene [145]. It is required for smooth muscle development in the lungs helps in airway wall “modeling”, and proper functioning of lungs throughout life [146,147].

*CTSB* (Cathepsin B) also known as amyloid precursor protein secretase (*APPS*) was upregulated. It is involved in the proteolytic processing of amyloid precursor protein [148]. Felbor et al [149] reported deficiency of *CTSB* results in brain atrophy and loss of nerve cells in mice. *CTSC* (Cathepsin C) was downregulated in the L/C group and upregulated in the L3/C group. Loss of function mutations in *CTSC* gene are associated with tooth and skin abnormalities [150].

*NAALAD2* was upregulated while *PAPLN*, *RNF130*, *TMPPRSS2*, *PGC*, *CPZ*, *FURIN* were downregulated. *CPZ* interacts with WNT proteins and may regulate embryonic development, however, its expression in adult tissues is less abundant [151]. *TPP2* and *SPPL2B* showed increased expression in L/C and decreased expression in L3/C. *PAPPA*, *GZMA*, *SERPINA1*, *QPCTL* transcripts were downregulated in L/C and upregulated in L3/C. Several hypothetical proteins (*FLJ10504*, *FLJ30679*, *FLJ90661*, *FLJ25179*, *DKFZp686L1818*) were differentially expressed.

## Cell Cycle, Cell Growth and Cell Proliferation

Fifteen transcripts having a role in cell cycle regulation, growth and proliferation were differentially expressed (Table S5). Four of the transcripts *SESN3*, *RAD1*, *GAS1* and *PARD6B* involved in cell cycle regulation were upregulated in both the groups. Cell growth factors, *INHBC* and *OGN* were induced in both the groups. *FGFR1OP* is a positive regulator of cell proliferation and showed increased expression. *KAZALD1*, *CDC20* and *CDKN2C* were downregulated.

Growth arrest specific gene 1 (*GAS1*) expression is positively required for postnatal cerebellum development. Mice lacking *GAS1* had significantly reduced cerebellar size compared to wild

type mice [152]. Liu et al [152] proposed that *GAS1* perform dual roles in cell cycle arrest and in proliferation in a cell autonomous manner. *PARD6B* has a role in axonogenesis [153].

*INHBC* is a member of transforming growth factor-beta superfamily (TGF-beta) and is involved cell growth and differentiation [154,155]. Osteoglycin (*OGN*) is also known as Mimecan and Osteoinductive factor (*OIF*). Mimecan is a member of small-leucine rich proteoglycan gene family and is a major component of cornea and other connective tissues [156,157]. It has a role in bone formation, cornea development and regulation of collagen fibrillogenesis in corneal stroma [157,158,159]. *CDC20* regulates anaphase-promoting complex [160].

## Response to Stress

*MSRA*, *SOD2*, *GSTA3* and *GSR* genes were differentially expressed (Table S5). *MSRA* was upregulated in both the supplement groups. *SOD2* is downregulated in L/C and upregulated in L3/C. *GSR* is upregulated in the L/C and downregulated in the L3/C. *GSTA3* is downregulated in both the groups.

Oxidative damage to proteins by reactive oxygen species is associated with oxidative stress, aging, and age-related diseases [161,162,163]. *MSRA* is expressed in the retina, neurons and the nervous system [162]. Knock-outs of the *MSRA* gene in mice result in shortened life-spans both under normoxia and hyperoxia conditions [164]. *MSRA* also participates in the regulation of proteins [165]. *MSRA* plays an important role in neurodegenerative diseases like Alzheimer's and Parkinson's by reducing the effects of reactive oxygen species [163]. Overexpression of *MSRA* protects human fibroblasts against H<sub>2</sub>O<sub>2</sub>-mediated oxidative stress [166]. *SOD2* belongs to the iron/manganese superoxide dismutase family. It encodes a mitochondrial protein and helps in the elimination of reactive oxygen species generated within mitochondria [167]. In our study increased amount of DHA reduced the expression of glutathione-related proteins *GSR* and *GSTA3*.

## Kinases and Phosphatases

Phosphorylation and dephosphorylation of proteins control a multitude of cellular processes. Several proteins having kinase activity were altered (Table S5). Of note, transcripts involving *STK3*, *STK6*, *HINT3*, *TLK1*, *DRF1*, *GUCY2C* and *NEK1* were significantly upregulated with increasing DHA. A number of MAP kinases were downregulated in L3/C group, including *MAP4K1*, *MAPK12*, *MAP3K2* and *MAP3K3*. Other transcripts which showed significantly decreased expression were *CKM*, *LMTK2*, *NEK11*, *TNK1*, *BRD4* and *MGC4796*.

Transcripts having dephosphorylation activity, including *ACPL2*, *KIAA1240*, *PPP2R3A*, *PPP1R12B*, *PTPRG*, *PPP3CA* and *ACPP* were upregulated in L3/C group (Table S5). *MTMR2*, *PPP1R7*, *PTPRN2* and *HDHD3* were significantly downregulated with increasing DHA.

## Transcription Factors

Several transcription factors are differentially expressed by dietary LCPUFA (Table S5). Zinc finger proteins, Homeo box proteins and RNA Pol II transcription factors were among them. Several of the Zinc finger proteins were upregulated in L3/C, which include *ZNF611*, *ZNF584*, *ZNF81*, *ZNF273*, *ZNF547*, *MYNN*, *ZBTB11*, *PRDM7*, *JJAZ1*, *ZNF582*, *MLLT10*, *ZNF567*, *ZNF44*, *ZNF286*, *ZFX*, *NAB1*, *ZNF198*, *ZNF347* and *ZNF207*, while *PCGF2*, *ZBTB9*, *ZNF297*, *WHSCIL1*, *SALLA*, *ZNF589*, *ZFY*, *ZNF146*, *ZNF419* and *ZNF479* were repressed in L3/C group. Zinc finger proteins exhibit varied biological functions in eukaryotes including activation of transcription, protein folding, regulation of apoptosis, lipid

binding etc [168]. Homeobox transcription factors, *TGIF2*, *PHTF1*, *OTP* and *HHEX* were induced whereas *PHOX2A*, *IRX1* and *MITF* were repressed in L3/C. RNA Pol II transcription factors (*BRCA1*, *TFCP2*, *CHD2*, *THRAP3*, *SMARCD2* and *NFE2L2*) showed increased expression in L3/C. However, transcripts for *UTF1*, *POU2F2*, *ELL*, *POLR2C*, *THRAP5*, *TGIF* and *GLIS1* showed decreased expression in L3/C. *SOX7* and *SOX12*, high mobility group (HMG) box proteins, were also differentially expressed. *zNF611* array expression results were confirmed by real time PCR (Table S4).

### Receptor Activity

Transcripts performing receptor activities were differentially expressed (Table S5). While increasing levels of DHA were associated with decreased expression of *CD40*, *ITGB7*, *IL20RA*, *CD14*, *DOK3*, *MR1*, *BZRAP1*, *RARA*, *CD3D*, *IL1R1*, *MCP*, *HOMER3* transcripts, increased expression was detected for *FCGR2B*, *IL31RA*, *MRC2*, *SCUBE3*, *CR2*, *NCR2*, *CRLF2*, *SLAMF1*, *EGFR* and *KIR3DL2*. Interestingly, retinoic acid receptor  $\alpha$  (*RARA*) activity was decreased in both the groups. *EGFR* expression levels were confirmed by QRT-PCR (Table S4).

### Ubiquitin Cycle

Twenty-five probe sets having a role in the ubiquitination process were differentially expressed (Table S5). Interestingly, five members of F-box protein family (*FBXL7*, *FBXL4*, *FBXL17*, *FBXW4* and *FBXW3*) showed increased expression in L3/C group. F-Box proteins participate in varied cellular processes such as signal transduction, development, regulation of transcription and transition of cell cycle. They contain protein-protein interaction domains and participate in phosphorylation-dependent ubiquitination [169,170]. Proteins associated with anaphase-promoting complex (*CDC23* and *ANAPC1*) were downregulated in L3/C group.

### Others

Transcripts involved in 1) calcium ion binding (*MGC33630*, *UMODL1*, *FLJ25818*, *S100Z*, *MGC12458*, *ITSN2* and *PRRG3*), 2) zinc ion binding (*FGD5*, *zFYVE28*, *PDLIM4*, *zCCHC6*, *zNF518* and *INSM2*), 3) ATP binding (*MMAA* and *C6orf102*), 4) GTP binding (*DOCK5*, *DOCK6*, *DOCK10*, *MFN1* and *GTP*), 5) nucleic acid binding (*IFIH1*, *C13orf10*, *DDX58*, *TNRC6C*, *RSN*, *zCCHC5*, *DJ467N11.1*, *MGC24039* and *LOC124245*), 6) DNA binding (*KIAA1305*, *HPI-BP74*, *H2AFY*, *C17orf31*, *HIST1H2BD* and *HIST1H1E*) 7) protein binding (*ABTB1*, *MGC50721*, *RANBP9*, *STXBP4*, *BTBD5* and *KLHL14*) and 8) protein folding (*HSPB3*, *DNAJB12*, *FKBP11* and *TBCC*) were all differentially expressed. Also, several transcripts which play a role in RNA processing events were differentially expressed. *SFRS2IP*, *LOC81691*, *EXOSC2*, *SFPQ*, *SNRPN* and *SFRS5* showed increased expression, whereas, *NOL5A*, *RBM19*, *NCBP2* and *PHF5A* showed decreased expression with increasing DHA. Transcripts related to immune response are also differentially expressed. *HLA-DPBI*, *MX2* and *IGHG1* were upregulated and *PLUNC* was downregulated with increasing DHA.

Finally, 406 transcripts with no known gene ontology functions were differentially expressed (Table S5). Several of these transcripts were among the most differentially expressed, among these, *H63*, *LOC283403*, *FLJ13611*, *PARP6*, *C6orf111*, *C10orf67*, *TTY8*, *C11orf1* and *PHAX* were upregulated, whereas transcripts for *CHRDL2*, *TSGA13*, *RP4-622L5*, *MGC5391*, *RNF126P1*, *FAM19A2* and *NOBIP* were repressed considerably.

### Ingenuity Network Analysis

We explored relationships among sets of genes using Ingenuity Systems network analysis. Out of 1108 differentially expressed probe sets in our data, 387 probe sets (34.93%) were found in the Ingenuity Pathway Analysis (IPA) knowledge database, and are labeled “focus” genes. Based on these focus genes, IPA generated 41 biological networks (Table S6). Among these 41 networks, 24 had scores of >8 and the top 2 networks with 35 genes had scores of 49. We focus here on the most significant network.

The top network identified by IPA is associated with nervous system development and function, cellular growth and proliferation (Figure 1). Epidermal growth factor receptor (*EGFR*) is the most outstanding interaction partner found within the network. *EGFR* interacts with *TIMP3*, *NRG1*, *ADAM17*, *EDG7* and *FGF7*; all are upregulated, and involved in neural or visual perception development. *EGFR* signaling is implicated in early events of epidermal, neural and eye development. Loss of *EGFR* signaling results in reduced brain size and loss of larval eye and optic lobe in *drosophila* [171]. *EGFR* expression is required for postnatal forebrain and astrocytes development in mice [172]. Functional pathway analysis conducted on this network using the IPA tool set identified three genes, *ADAM17*, *NUMB* and *HES1*, involved in the Notch signaling pathway which regulates nervous system and eye development [173,174]. *ADAM17* and *NUMB* were upregulated while *HES1* was repressed in both the groups. This analysis suggests that LCPUFA influence many processes with influences that converge on *EGFR*.

LCPUFA are known to directly interact with nutrient sensitive transcription factors such as peroxisome proliferator-activated receptors (PPARs), liver x receptors, hepatic nuclear factor-4 $\alpha$ , sterol regulatory binding proteins, retinoid x receptors and NF- $\kappa$ B. Upon ingestion, LCPUFA can elicit a transcriptional response within minutes [31,175,176,177]. Microarray studies on LCPUFA-supplementing animals have identified several tissue-specific pathways regulated by LCPUFA, particularly involving the liver, adipose, and brain tissue transcriptome [26,178,179]. Using murine 11K Affymetrix oligoarrays, Berger et al [178] [180] showed increased hepatic expression of lipolytic and decreased expression of lipogenic genes. However, in the hippocampus brain region, increased expression of *HTR4* and decreased expression of *TTR* and *SIAT8E*, genes involved in the regulation of cognition and learning, as well as *POMC*, a gene associated with appetite control, was identified. The first paper published on the brain gene transcriptome with respect to LCPUFA supplementation by Kitajka et al. in 2002 [181] demonstrated that feeding fish oil (DHA 26.9%) to rats increased expression of genes involved in lipid metabolism (*SPTLC2*, *FPS*), energy metabolism (ATP synthase subunit d, ATP synthase H<sup>+</sup>, cytochromes, *IDH3G*), cytoskeleton (Actin related protein 2, *TUBA1*), signal transduction (Calmodulins, *SH3P4*, *RAB6B* small GTPase), receptors, ion channels and neurotransmission (Vasopressin V1b receptor, Somatostatin), synaptic plasticity (Synucleins) and regulatory proteins (protein phosphatases). In the same study, fish oil supplementation also significantly reduced the expression of phospholipase D and Transthyretin. In related work, Kitajka et al [26], using rat cDNA microarrays with 3,200 spots, found results similar to those previously reported. Barcelo-Coblijn et al. [182] were the first to report moderation of age-induced changes in gene expression in rat brain as a result of diets rich in fish oil (DHA 11.2%). In this study, 2 month old rats showed increased expression of *SNCA* and *TTR*, however, 2-year old rats exhibited no significant changes. In addition, Puskas et al. [183] demonstrated that administration of omega-3 fatty acids from fish oil (5% EPA and 27% DHA; total fat content: 8%) for 4 weeks in 2 year

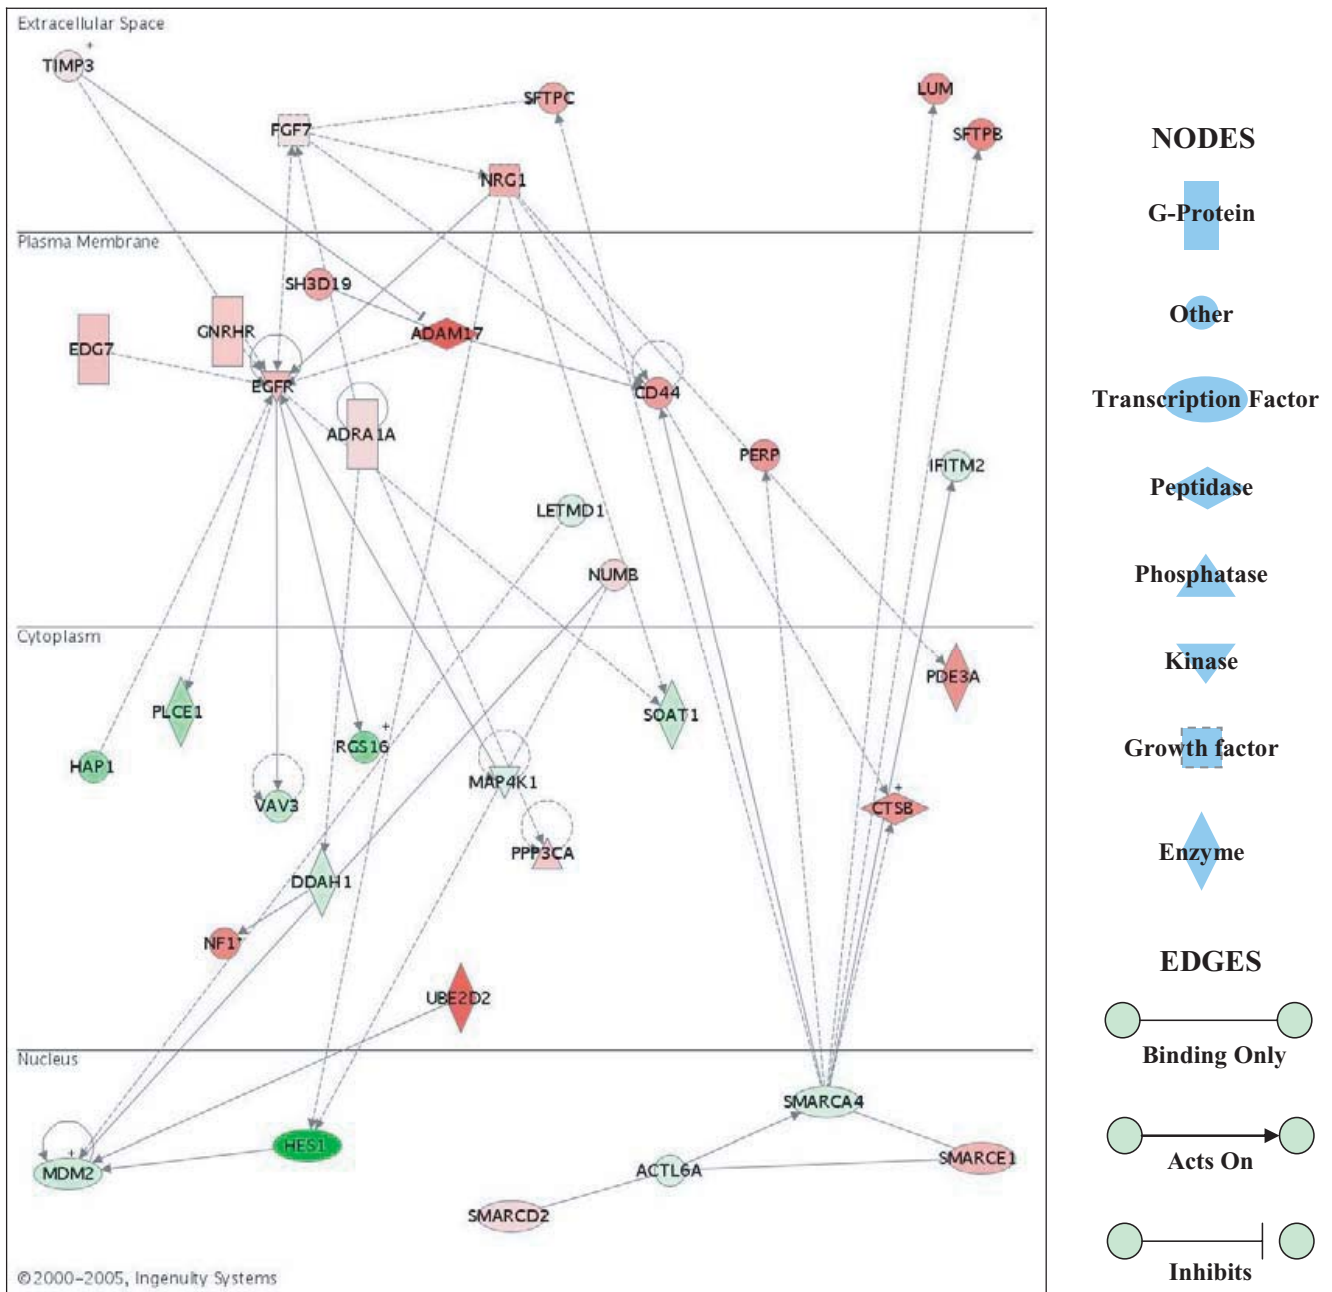

**Red- Upregulation**  
**Green- Downregulation**

**Figure 1.** Ingenuity network analysis showing gene interactions generated from L3/C comparisons. Network is graphically represented as nodes (genes) and edges (the biological relationship between genes). doi:10.1371/journal.pone.0000370.g001

old rats induced expression of transthyretin and mitochondrial creatine kinase and decreased expression of *HSP86*, *ApoC-1* and Makorin RING zinc-finger protein 2, genes in hippocampus brain region. Finally, Flachs et al [179] showed increased expression of genes for mitochondrial proteins in adipose tissue.

In comparison with previous brain transcriptome analyses, the present study employing the use of high-density Affymetrix oligoarrays (>54,000 ps) revealed genes differentially regulated by LCPUFA at ranges mimicking breastmilk. With the exception

of *SPTLC2*, which we also found to be upregulated in the L/C and L3/C comparisons, none of the remaining, previously identified genes, were differentially expressed in our dataset. Many factors are likely to contribute to the observed differences in differentially expressed genes between our study and previous work. One likely source is the difference in dietary DHA/ARA, which is within the range of human and baboon breastmilk; previous studies used much higher amounts of DHA, from 11.2% to 27% [182,183]. Also, interactions between levels of ARA and DHA supplied in our



study add some complexity to the interpretation since the three treatments do not represent a strict dose response to DHA. However, our DHA and ARA come from sources that are routinely consumed by human infants in commercial infant formulas, and thus are directly relevant to that group. Despite lower levels of DHA/ARA, genes in our data set show subtle changes in expression. Moreover, the magnitude of these results is not surprising given the nutritional focus of the study, in which subtle, widespread shifts in transcription may have profound biological effects. Our data indicate that LCPUFA supplementation within the ranges of breastmilk will induce global changes in gene expression across numerous biological processes.

## Conclusions

The impact of DHA and ARA on infant baboons was both significant and widespread. We identified several novel differentially-expressed transcripts in 12-week old baboon cerebral cortexes modulated by dietary LCPUFA. The majority of probe sets showed subtle changes in gene transcription. In the cerebral cortex, we observed increased expression of mitochondrial proton carrier, *UCP2* (uncoupling protein 2) in both groups, but more in L3/C. *PLA2G6*, implicated in childhood neurodegeneration, was differentially expressed. *TIA1*, a silencer of the *COX2* gene translation is upregulated in L3/C. Increased expression was observed for *TIMM8A*, *NRG1*, *SEMA3D* and *NUMB*, genes involved in neural development. *LUM*, *EML2*, *TIMP3* and *TTC8* genes with roles in visual perception were upregulated. Hepatic nuclear factor-4 $\alpha$  (*HNF4A*) showed decreased expression with increasing DHA. *RARA* was repressed in both the groups. A network involving 35 genes attributed to neural development and function was identified using Ingenuity pathway analysis, emphasizing *EGFR* as the most outstanding interaction partner in the network. In this network *EGFR* interacts with genes involved in neural or visual perception, *TIMP3*, *NRG1*, *ADAM17*, *EDG7* and *FGF7*. Although subtle, the upregulation of *NUMB* and downregulation of *HES1* in the Notch signaling pathway, not previously shown to interact with fatty acids, supports the involvement of LCPUFA, particularly DHA, in neural development. Interestingly, no known desaturases and only one elongase, LCPUFA biosynthetic enzymes, were differentially expressed in cerebral cortex. In a study of liver gene expression in preparation, fatty acid desaturases *SCD* and *FADS1* were significantly downregulated in liver, where we identified a multifunctional protein *TOBI* which is significantly upregulated.

These data represent the first comprehensive transcriptome analysis in primates and have identified widespread changes in cerebral cortex genes that are modulated by increases in DHA, induced by dietary means. Importantly, the range of DHA used here is within limits of human and primate breastmilks, the natural food for infants, and indicate that CNS gene expression responds to LCPUFA concentrations.

## MATERIALS AND METHODS

Details of experimental design, animal characteristics, and tissue sampling are available elsewhere [38] and will be outlined briefly here.

### Animals and Diets

The animal phase took place at the Southwest Foundation for Biomedical Research (SFBR), San Antonio, TX, and was approved for animal care and research protocols from SFBR and Cornell University Institutional Animal Care and Use Committee (IACUC). Twelve baboon neonates born spontane-

ously around 182 days gestation were randomized into 3 groups (n=4 per group). They were fed for 12 weeks on one of three formulas: C: Control (no DHA-ARA); L: 1 $\times$ LCPUFA (0.33%DHA-0.67%ARA); L3: 3 $\times$ LCPUFA (1.00%DHA-0.67%ARA). Formulas in color-coded cans were kindly provided by Mead-Johnson Nutritionals (Evansville, IN) in ready-to-feed form, 2 colors per treatment, so that investigators were masked to the treatments.

### Sampling and Array Hybridization

Twelve week old baboon neonates were anesthetized and euthanized at  $84.4 \pm 1.1$  days. Tissue collected from the precentral gyrus of the cerebral cortex was placed in RNALater according to vendor instructions and was used for the microarray analysis and validation of microarray results.

Microarray studies utilizing baboon samples with human oligonucleotide arrays have been successfully carried out previously [184,185]. Cerebral cortex global messenger RNA in the three groups was analyzed using Affymetrix Genechip<sup>TM</sup> HG-U133 Plus 2.0 arrays <<http://www.affymetrix.com/products/arrays/specific/hgu133plus.affx>>. The HG-U133 Plus 2.0 has >54,000 probe sets representing 47,000 transcripts and variants, including 38,500 well-characterized human genes. One hybridization was performed for each animal (12 chips total). RNA preparations and array hybridizations were processed at Genome Explorations, Memphis, TN <<http://www.genome-explorations.com>>. The completed raw data sets were downloaded from the Genome Explorations secure ftp servers.

### Microarray Data Analysis

Raw data (.CEL files) were uploaded into Iobion's Gene Traffic MULTI 3.2 (Iobion Informatics, La Jolla, CA, USA) and analyzed by using the robust multi-array analysis (RMA) method. In general, RMA performs three operations specific to Affymetrix GeneChip arrays: global background normalization, normalization across all of the selected hybridizations, and log<sub>2</sub> transformation of perfect match oligonucleotide probe values [186]. Statistical analysis using the significance analysis tool set in Gene Traffic was utilized to perform Multiclass ANOVA on all probe level normalized data. Pairwise comparisons were made between C vs L and C vs L3 and all probe set comparisons reaching  $P < 0.05$  were included in the analysis. Gene lists of differentially expressed probe sets were generated from this output for functional analysis.

### Bioinformatics analysis

Expression data was annotated using NIH DAVID <<http://apps1.niaid.nih.gov/david>> [187] and NetAffx <<http://www.affymetrix.com/analysis/index.affx>>. Genes were grouped into functional categories and pathways based on the Gene Ontology Consortium <<http://www.geneontology.org>>, Kyoto Encyclopedia of Genes and Genomes (KEGG) pathway Database <<http://www.genome.jp/kegg/pathway.html>> and <BioCarta <<http://www.biocarta.com/>>. Data presented in this manuscript is accessible through GEO Series accession number GSE6519 (GEO, <http://www.ncbi.nlm.nih.gov/geo/>).

### RNA Isolation and RT PCR

RT PCR was conducted on nine genes to confirm the results of the array analysis. Total RNA from 30 mg samples of baboon cerebral cortex brain tissue homogenates was extracted using the RNeasy Mini kit (Qiagen, Valencia, CA). Each RNA preparation was treated with DNase I according to the manufacturer's instructions.

The yield of total RNA was assessed by 260 nm UV absorption. The quality of RNA was analyzed by 260/280 nm ratios of the samples and by agarose gel electrophoresis to verify RNA integrity.

One-microgram total RNA from each group (C, L, L3) was reverse-transcribed into first strand cDNA using the iScript cDNA synthesis kit (Bio-Rad, Hercules, CA). The iScript reverse transcriptase is a modified MMLV-derived reverse transcriptase and the iScript reaction mix contains both oligo(dT) and random primers. The generated first strand cDNA is stored at  $-20^{\circ}\text{C}$  until used.

Quantitative real-time PCR using SYBR green and TaqMan assay methods was used to verify the differential expression of selected genes that were upregulated in L3/C comparison. All the primers were gene-specific and generated from human sequences <www.ensembl.org>. PCR primers were designed with Primer-Quest software (IDT, Coralville, IA) and ordered from Integrated DNA Technologies (IDT, Coralville, IA). Initially primers were tested by polymerase chain reactions with baboon cerebral cortex brain cDNA as template in a 30  $\mu\text{l}$  reaction volume using Eppendorf gradient thermal cycler (Eppendorf), with 1  $\mu\text{m}$  of each primer, 0.25 mM each of dNTPs, 3  $\mu\text{l}$  of 10 $\times$ PCR buffer (Perkin-Elmer Life Sciences, Foster City, CA, USA), 1.5 mM  $\text{MgCl}_2$  and 1.5 U *Taq* polymerase (Ampli *Taq* II; Perkin-Elmer Life Sciences). Thermal cycling conditions were: initial denaturation at  $95^{\circ}\text{C}$  for 5 min followed by 25–35 cycles of denaturation at  $95^{\circ}\text{C}$  for 30 s, annealing at  $60^{\circ}\text{C}$  for 1 min and extension at  $72^{\circ}\text{C}$  for 1 min, with a final extension at  $72^{\circ}\text{C}$  for 2 min. PCR products were separated by electrophoresis on 2% agarose gel stained with ethidium bromide and bands of appropriate sizes were obtained. The PCR products of *LUM*, *TIMM8A*, *UCP2*,  $\beta$ -*ACTIN*, *ADAM17* and *ATP8B1* were sequenced and deposited with GenBank (Acc Numbers: DQ779570, DQ779571, DQ779572, DQ779573, DQ779574 and DQ779575, respectively).

Initially standardized primers for genes (*ATP8B1*, *ADAM17*, *NF1*, *FZD3*, *ZNF611*, *UCP2*, *EGFR* and control  $\beta$ -*ACTIN*) were used for SYBR green real time PCR assay (Power SYBR Green PCR Master Mix, Applied Biosystems, Foster City, CA). We used the baboon *LUM*, *TIMM8A* and  $\beta$ -*ACTIN* sequences to design TaqMan Assay (Assay by Design; <www.appliedbiosystems.com>). The selected gene symbols, primer pairs and probe details are depicted in Table S3. Quantitative real time PCR reactions were done with the Applied Biosystems Prism 7300/7500 real time PCR system (Applied Biosystems, Foster City, CA). After 2 minutes of UNG activation at  $50^{\circ}\text{C}$ , initial denaturation at  $95^{\circ}\text{C}$  was carried out for 10 minutes, the cycling conditions of 40 cycles consisted of denaturation at  $95^{\circ}\text{C}$  for 15 seconds, annealing at  $60^{\circ}\text{C}$  for 30 seconds, and elongation at  $72^{\circ}\text{C}$  for 1 minute. For SYBR green method UNG activation step is eliminated. All reactions were done in triplicate and  $\beta$ -*ACTIN* was used as the reference gene. Relative quantification was performed by using comparative C<sub>T</sub> method (ABI Relative Quantification Chemistry guide # 4347824).

## Network Analysis

We used a new web-delivered bioinformatics tool set, Ingenuity pathway analysis (IPA 3.0) <http://www.ingenuity.com>, to identify functional networks influenced by our dietary treatments. IPA is a knowledge database generated from the peer-reviewed scientific publications that enables discovery, visualization and exploration of functional biological networks in gene expression data and delineates the functions most significant to those networks. The 1108 differentially expressed probe sets identified

by microarray data, as discussed below, were used for network analyses. Affymetrix probe set ID's were uploaded into IPA and queried against all other genes stored in the IPA knowledge database to generate a set of networks having up to 35 genes. Each Affymetrix probe set ID was mapped to its corresponding gene identifier in the IPA knowledge database. Probe sets representing genes having direct interactions with genes in the IPA knowledge database are called “focus” genes, which were then used as a starting point for generating functional networks. Each generated network is assigned a score according to the number of differentially regulated focus genes in our dataset. These scores are derived from negative logarithm of the *P* indicative of the likelihood that focus genes found together in a network due to random chance. Scores of 4 or higher have 99.9% confidence level of significance as defined in detail elsewhere [188].

## SUPPORTING INFORMATION

**Table S1A** Genes with known function upregulated by L3 (1.00%DHA-0.67%ARA) in Brain  
Found at: doi:10.1371/journal.pone.0000370.s001 (0.16 MB XLS)

**Table S1B** Genes with known function downregulated by L3 (1.00%DHA-0.67%ARA) in Brain  
Found at: doi:10.1371/journal.pone.0000370.s002 (0.18 MB XLS)

**Table S1C** Genes without known function upregulated by L3 (1.00%DHA-0.67%ARA) in Brain  
Found at: doi:10.1371/journal.pone.0000370.s003 (0.08 MB XLS)

**Table S1D** Genes without known function downregulated by L3 (1.00%DHA-0.67%ARA) in Brain  
Found at: doi:10.1371/journal.pone.0000370.s004 (0.07 MB XLS)

**Table S2** Probe sets showing  $\geq 1.4$  fold changes in gene expression  
Found at: doi:10.1371/journal.pone.0000370.s005 (0.02 MB XLS)

**Table S3** Primers and Probe Sequences  
Found at: doi:10.1371/journal.pone.0000370.s006 (0.02 MB XLS)

**Table S4** Comparison of microarray versus QRT-PCR gene expression values (Fold-changes)  
Found at: doi:10.1371/journal.pone.0000370.s007 (0.01 MB XLS)

**Table S5** Classification According to Gene Ontology Functions for Brain  
Found at: doi:10.1371/journal.pone.0000370.s008 (0.28 MB XLS)

**Table S6** Ingenuity functional network analysis  
Found at: doi:10.1371/journal.pone.0000370.s009 (0.07 MB XLS)

## ACKNOWLEDGMENTS

### Author Contributions

Conceived and designed the experiments: JB KK JA AH. Performed the experiments: PN KK AH. Analyzed the data: JB BP KK. Wrote the paper: JB KK. Other: Contributed to experimental design: PN. Edited the manuscript: BP AH PN JA.

## REFERENCES

- Crawford MA, Casperd NM, Sinclair AJ (1976) The long chain metabolites of linoleic and linolenic acids in liver and brain in herbivores and carnivores. *Comp Biochem Physiol B* 54: 395–401.
- Diau GY, Hsieh AT, Sarkadi-Nagy EA, Wijendran V, Nathanielsz PW, et al. (2005) The influence of long chain polyunsaturated supplementation on docosahexaenoic acid and arachidonic acid in baboon neonate central nervous system. *BMC Med* 3: 11.
- Benolken RM, Anderson RE, Wheeler TG (1973) Membrane fatty acids associated with the electrical response in visual excitation. *Science* 182: 1253–1254.
- Martinez M (1992) Tissue levels of polyunsaturated fatty acids during early human development. *J Pediatr* 120: S129–138.
- Morale SE, Hoffman DR, Castaneda YS, Wheaton DH, Burns RA, et al. (2005) Duration of long-chain polyunsaturated fatty acids availability in the diet and visual acuity. *Early Hum Dev* 81: 197–203.
- Marszalek JR, Lodish HE (2005) Docosahexaenoic acid, fatty acid-interacting proteins, and neuronal function: Breastmilk and fish are good for you. *Annual Review of Cell and Developmental Biology* 21: 633–657.
- Brenna JT (2002) Efficiency of conversion of alpha-linolenic acid to long chain n-3 fatty acids in man. *Curr Opin Clin Nutr Metab Care* 5: 127–132.
- Brenna JT, Varamini B, Jensen RG, Diersen-Schade DA, Boettcher JA, et al. (2006) Docosahexaenoic and arachidonic acid concentrations in human breastmilk worldwide. *Pediatrics* submitted.
- Innis SM, Kuhlein HV (1988) Long-Chain N-3 Fatty-Acids in Breast-Milk of Inuit Women Consuming Traditional Foods. *Early Human Development* 18: 185–189.
- Finley DA, Lonnerdal B, Dewey KG, Grivetti LE (1985) Breast milk composition: fat content and fatty acid composition in vegetarians and non-vegetarians. *Am J Clin Nutr* 41: 787–800.
- Wang L, Shimizu Y, Kaneko S, Hanaka S, Abe T, et al. (2000) Comparison of the fatty acid composition of total lipids and phospholipids in breast milk from Japanese women. *Pediatr Int* 42: 14–20.
- Makrides M, Neumann MA, Gibson RA (1996) Effect of maternal docosahexaenoic acid (DHA) supplementation on breast milk composition. *Eur J Clin Nutr* 50: 352–357.
- Lauritzen L, Jorgensen MH, Hansen HS, Michaelsen KF (2002) Fluctuations in human milk long-chain PUFA levels in relation to dietary fish intake. *Lipids* 37: 237–244.
- Jensen CL, Prager TC, Fraley JK, Chen HM, Anderson RE, et al. (1997) Effect of dietary linoleic/alpha-linolenic acid ratio on growth and visual function of term infants. *Journal of Pediatrics* 131: 200–209.
- Makrides M, Neumann MA, Jeffrey B, Lien EL, Gibson RA (2000) A randomized trial of different ratios of linoleic to alpha-linolenic acid in the diet of term infants: effects on visual function and growth. *American Journal of Clinical Nutrition* 71: 120–129.
- Gibson RA, Chen W, Makrides M (2001) Randomized trials with polyunsaturated fatty acid interventions in preterm and term infants: functional and clinical outcomes. *Lipids* 36: 873–883.
- Willatts P, Forsyth JS, DiModugno MK, Varma S, Colvin M (1998) Effect of long-chain polyunsaturated fatty acids in infant formula on problem solving at 10 months of age. *Lancet* 352: 688–691.
- Birch EE, Garfield S, Hoffman DR, Uauy R, Birch DG (2000) A randomized controlled trial of early dietary supply of long-chain polyunsaturated fatty acids and mental development in term infants. *Developmental Medicine and Child Neurology* 42: 174–181.
- Birch EE, Castaneda YS, Wheaton DH, Birch DG, Uauy RD, et al. (2005) Visual maturation of term infants fed long-chain polyunsaturated fatty acid-supplemented or control formula for 12 mo. *American Journal of Clinical Nutrition* 81: 871–879.
- Clandinin MT, Van Aerde JE, Merkel KL, Harris CL, Springer MA, et al. (2005) Growth and development of preterm infants fed infant formulas containing docosahexaenoic acid and arachidonic acid. *Journal of Pediatrics* 146: 461–468.
- Clandinin MT, Chappell JE, Leong S, Heim T, Swyer PR, et al. (1980) Intrauterine Fatty-Acid Accretion Rates in Human-Brain-Implications for Fatty-Acid Requirements. *Early Human Development* 4: 121–129.
- Martinez M, Mougan I (1998) Fatty acid composition of human brain phospholipids during normal development. *Journal of Neurochemistry* 71: 2528–2533.
- Lauritzen L, Jorgensen MH, Olsen SF, Straarup EM, Michaelsen KF (2005) Maternal fish oil supplementation in lactation: effect on developmental outcome in breast-fed infants. *Reproduction Nutrition Development* 45: 535–547.
- Clandinin MT, Chappell JE, Leong S, Heim T, Swyer PR, et al. (1980) Extra-Uterine Fatty-Acid Accretion in Infant Brain-Implications for Fatty-Acid Requirements. *Early Human Development* 4: 131–138.
- Treen M, Uauy RD, Jameson DM, Thomas VL, Hoffman DR (1992) Effect of Docosahexaenoic Acid on Membrane Fluidity and Function in Intact Cultured Y-79 Retinoblastoma Cells. *Archives of Biochemistry and Biophysics* 294: 564–570.
- Kitajka K, Sinclair AJ, Weisinger RS, Weisinger HS, Mathai M, et al. (2004) Effects of dietary omega-3 polyunsaturated fatty acids on brain gene expression. *Proceedings of the National Academy of Sciences of the United States of America* 101: 10931–10936.
- Alessandri JM, Guesnet P, Vancassel S, Astorg P, Denis I, et al. (2004) Polyunsaturated fatty acids in the central nervous system: evolution of concepts and nutritional implications throughout life. *Reproduction Nutrition Development* 44: 509–538.
- Stillwell W, Shaikh SR, Zerouga M, Siddiqui R, Wassall SR (2005) Docosahexaenoic acid affects cell signaling by altering lipid rafts. *Reproduction Nutrition Development* 45: 559–579.
- Grossfield A, Feller SE, Pitman MC (2006) A role for direct interactions in the modulation of rhodopsin by omega-3 polyunsaturated lipids. *Proc Natl Acad Sci U S A* 103: 4888–4893.
- Calderon F, Kim HY (2004) Docosahexaenoic acid promotes neurite growth in hippocampal neurons. *Journal of Neurochemistry* 90: 979–988.
- Clarke SD, Jump DB (1994) Dietary polyunsaturated fatty acid regulation of gene transcription. *Annu Rev Nutr* 14: 83–98.
- Barker DJ, Martyn CN, Osmond C, Hales CN, Fall CH (1993) Growth in utero and serum cholesterol concentrations in adult life. *Bmj* 307: 1524–1527.
- de Rooij SR, Painter RC, Roseboom TJ, Phillips DI, Osmond C, et al. (2006) Glucose tolerance at age 58 and the decline of glucose tolerance in comparison with age 50 in people prenatally exposed to the Dutch famine. *Diabetologia* 49: 637–643.
- Barker DJ (2003) Coronary heart disease: a disorder of growth. *Horm Res* 59 Suppl 1: 35–41.
- Weisinger HS, Armitage JA, Sinclair AJ, Vingrys AJ, Burns PL, et al. (2001) Perinatal omega-3 fatty acid deficiency affects blood pressure later in life. *Nat Med* 7: 258–259.
- Baur LA, O'Connor J, Pan DA, Kriketos AD, Storlien LH (1998) The fatty acid composition of skeletal muscle membrane phospholipid: its relationship with the type of feeding and plasma glucose levels in young children. *Metabolism* 47: 106–112.
- Sarkadi-Nagy E, Wijendran V, Diau GY, Chao AC, Hsieh AT, et al. (2004) Formula feeding potentiates docosahexaenoic and arachidonic acid biosynthesis in term and preterm baboon neonates. *J Lipid Res* 45: 71–80.
- Hsieh AT, Anthony JC, Diersen-Schade DA, Rumsey SC, Lawrence P, et al. (2007) The influence of moderate and high dietary docosahexaenoic acid on baboon neonate neural fatty acids. *Ped Res* In Press.
- Morgan NV, Westaway SK, Morton JE, Gregory A, Gissen P, et al. (2006) PLA2G6, encoding a phospholipase A2, is mutated in neurodegenerative disorders with high brain iron. *Nat Genet* 38: 752–754.
- Khateeb S, Flusser H, Ofir R, Shelef I, Narkis G, et al. (2006) PLA2G6 Mutation Underlies Infantile Neuroaxonal Dystrophy. *Am J Hum Genet* 79: 942–948.
- Leonard AE, Bobik EG, Dorado J, Kroeger PE, Chuang LT, et al. (2000) Cloning of a human cDNA encoding a novel enzyme involved in the elongation of long-chain polyunsaturated fatty acids. *Biochem J* 350 Pt 3: 765–770.
- Leonard AE, Kelder B, Bobik EG, Chuang LT, Lewis CJ, et al. (2002) Identification and expression of mammalian long-chain PUFA elongation enzymes. *Lipids* 37: 733–740.
- Welsch DJ, Creely DP, Hauser SD, Mathis KJ, Krivi GG, et al. (1994) Molecular cloning and expression of human leukotriene-C4 synthase. *Proc Natl Acad Sci U S A* 91: 9745–9749.
- Buchner J (1999) Hsp90&Co.-a holding for folding. *Trends Biochem Sci* 24: 136–141.
- Weaver AJ, Sullivan WP, Felts SJ, Owen BA, Toft DO (2000) Crystal structure and activity of human p23, a heat shock protein 90 co-chaperone. *J Biol Chem* 275: 23045–23052.
- Holt SE, Aisner DL, Baur J, Tesmer VM, Dy M, et al. (1999) Functional requirement of p23 and Hsp90 in telomerase complexes. *Genes Dev* 13: 817–826.
- Rozen R, Vockley J, Zhou L, Milos R, Willard J, et al. (1994) Isolation and expression of a cDNA encoding the precursor for a novel member (ACADSB) of the acyl-CoA dehydrogenase gene family. *Genomics* 24: 280–287.
- Ye X, Ji C, Zhou C, Zeng L, Gu S, et al. (2004) Cloning and characterization of a human cDNA ACAD10 mapped to chromosome 12q24.1. *Mol Biol Rep* 31: 191–195.
- Mawal YR, Qureshi IA (1994) Purification to homogeneity of mitochondrial acyl coa:glycine n-acyltransferase from human liver. *Biochem Biophys Res Commun* 205: 1373–1379.
- Mawal Y, Paradis K, Qureshi IA (1997) Developmental profile of mitochondrial glycine N-acyltransferase in human liver. *J Pediatr* 130: 1003–1007.
- Waterham HR, Koster J, Romeijn GJ, Hennekam RC, Vreken P, et al. (2001) Mutations in the 3beta-hydroxysterol Delta24-reductase gene cause desmosterolosis, an autosomal recessive disorder of cholesterol biosynthesis. *Am J Hum Genet* 69: 685–694.
- Peri A, Danza G, Serio M (2005) Seladin-1 as a target of estrogen receptor activation in the brain: a new gene for a rather old story? *J Endocrinol Invest* 28: 285–293.
- Benvenuti S, Luciani P, Vannelli GB, Gelmini S, Franceschi E, et al. (2005) Estrogen and selective estrogen receptor modulators exert neuroprotective

- effects and stimulate the expression of selective Alzheimer's disease indicator-1, a recently discovered antiapoptotic gene, in human neuroblast long-term cell cultures. *J Clin Endocrinol Metab* 90: 1775–1782.
54. Evans AM (2006) AMP-activated protein kinase and the regulation of Ca<sup>2+</sup> signalling in O<sub>2</sub>-sensing cells. *J Physiol*.
  55. Watt MJ, Dzamko N, Thomas WG, Rose-John S, Ernst M, et al. (2006) CNTF reverses obesity-induced insulin resistance by activating skeletal muscle AMPK. *Nat Med* 12: 541–548.
  56. Dyck JR, Lopaschuk GD (2006) AMPK alterations in cardiac physiology and pathology: enemy or Ally? *J Physiol*.
  57. Miyazaki A, Kanome T, Watanabe T (2005) Inhibitors of acyl-coenzyme a: cholesterol acyltransferase. *Curr Drug Targets Cardiovasc Haematol Disord* 5: 463–469.
  58. Stein O, Stein Y (2005) Lipid transfer proteins (LTP) and atherosclerosis. *Atherosclerosis* 178: 217–230.
  59. Leon C, Hill JS, Wasan KM (2005) Potential role of acyl-coenzyme A : cholesterol transferase (ACAT) inhibitors as hypolipidemic and antiatherosclerosis drugs. *Pharmaceutical Research* 22: 1578–1588.
  60. Bull LN, van Eijk MJ, Pawlikowska L, DeYoung JA, Juijn JA, et al. (1998) A gene encoding a P-type ATPase mutated in two forms of hereditary cholestasis. *Nat Genet* 18: 219–224.
  61. Mullenbach R, Bennett A, Tetlow N, Patel N, Hamilton G, et al. (2005) ATP8B1 mutations in British cases with intrahepatic cholestasis of pregnancy. *Gut* 54: 829–834.
  62. Liu H, Maurice DH (1998) Expression of cyclic GMP-inhibited phosphodiesterases 3A and 3B (PDE3A and PDE3B) in rat tissues: differential subcellular localization and regulated expression by cyclic AMP. *Br J Pharmacol* 125: 1501–1510.
  63. Ding B, Abe J, Wei H, Huang Q, Walsh RA, et al. (2005) Functional role of phosphodiesterase 3 in cardiomyocyte apoptosis: implication in heart failure. *Circulation* 111: 2469–2476.
  64. Kuthe A, Magert H, Uckert S, Forssmann WG, Stief CG, et al. (2000) Gene expression of the phosphodiesterases 3A and 5A in human corpus cavernosum penis. *Eur Urol* 38: 108–114.
  65. Zhang Y, Proenca R, Maffei M, Barone M, Leopold L, et al. (1994) Positional cloning of the mouse obese gene and its human homologue. *Nature* 372: 425–432.
  66. Halaas JL, Gajiwala KS, Maffei M, Cohen SL, Chait BT, et al. (1995) Weight-reducing effects of the plasma protein encoded by the obese gene. *Science* 269: 543–546.
  67. Stephens TW, Basinski MJ, Bristow PK, Bue-Valleskey JM, Burgett SG, et al. (1995) The role of neuropeptide Y in the antiobesity action of the obese gene product. *Nature* 377: 530–532.
  68. Schwartz MW, Seeley RJ, Campfield LA, Burn P, Baskin DG (1996) Identification of targets of leptin action in rat hypothalamus. *J Clin Invest* 98: 1101–1106.
  69. Baillie RA, Takada R, Nakamura M, Clarke SD (1999) Coordinate induction of peroxisomal acyl-CoA oxidase and UCP-3 by dietary fish oil: a mechanism for decreased body fat deposition. *Prostaglandins Leukot Essent Fatty Acids* 60: 351–356.
  70. Hun CS, Hasegawa K, Kawabata T, Kato M, Shimokawa T, et al. (1999) Increased uncoupling protein2 mRNA in white adipose tissue, and decrease in leptin, visceral fat, blood glucose, and cholesterol in KK-Ay mice fed with eicosapentaenoic and docosahexaenoic acids in addition to linolenic acid. *Biochem Biophys Res Commun* 259: 85–90.
  71. Mattiasson G, Sullivan PG (2006) The emerging functions of UCP2 in health, disease, and therapeutics. *Antioxid Redox Signal* 8: 1–38.
  72. Sullivan PG, Dube C, Dorenbos K, Steward O, Baram TZ (2003) Mitochondrial uncoupling protein-2 protects the immature brain from excitotoxic neuronal death. *Ann Neurol* 53: 711–717.
  73. Blachly-Dyson E, Baldini A, Litt M, McCabe ER, Forte M (1994) Human genes encoding the voltage-dependent anion channel (VDAC) of the outer mitochondrial membrane: mapping and identification of two new isoforms. *Genomics* 20: 62–67.
  74. Shafir I, Feng W, Shoshan-Barmataz V (1998) Voltage-dependent anion channel proteins in synaptosomes of the torpedo electric organ: immunolocalization, purification, and characterization. *J Bioenerg Biomembr* 30: 499–510.
  75. Massa R, Marliera LN, Martorana A, Cicconi S, Pierucci D, et al. (2000) Intracellular localization and isoform expression of the voltage-dependent anion channel (VDAC) in normal and dystrophic skeletal muscle. *J Muscle Res Cell Motil* 21: 433–442.
  76. Sampson MJ, Decker WK, Beaudet AL, Ruitenbeek W, Armstrong D, et al. (2001) Immobile sperm and infertility in mice lacking mitochondrial voltage-dependent anion channel type 3. *J Biol Chem* 276: 39206–39212.
  77. Percy ME, Wong S, Bauer S, Liaghati-Nasseri N, Perry MD, et al. (1998) Iron metabolism and human ferritin heavy chain cDNA from adult brain with an elongated untranslated region: new findings and insights. *Analyst* 123: 41–50.
  78. Salem N Jr, Litman B, Kim HY, Gawrisch K (2001) Mechanisms of action of docosahexaenoic acid in the nervous system. *Lipids* 36: 945–959.
  79. Bomsel M, Mostov K (1992) Role of heterotrimeric G proteins in membrane traffic. *Mol Biol Cell* 3: 1317–1328.
  80. Offermanns S, Mancino V, Revel JP, Simon MI (1997) Vascular system defects and impaired cell chemokinesis as a result of G $\alpha$ 13 deficiency. *Science* 275: 533–536.
  81. Liu AM, Wong YH (2005) Activation of nuclear factor  $\kappa$ B by somatostatin type 2 receptor in pancreatic acinar AR42J cells involves G $\alpha$ 14 and multiple signaling components: a mechanism requiring protein kinase C, calmodulin-dependent kinase II, ERK, and c-Src. *J Biol Chem* 280: 34617–34625.
  82. Usdin TB, Gruber C, Bonner TI (1995) Identification and functional expression of a receptor selectively recognizing parathyroid hormone, the PTHrP receptor. *J Biol Chem* 270: 15455–15458.
  83. Usdin TB, Wang T, Hoare SR, Mezey E, Palkovits M (2000) New members of the parathyroid hormone/parathyroid hormone receptor family: the parathyroid hormone 2 receptor and tuberoinfundibular peptide of 39 residues. *Front Neuroendocrinol* 21: 349–383.
  84. Harzenetter MD, Keller U, Beer S, Riedl C, Peschel C, et al. (2002) Regulation and function of the CGRP receptor complex in human granulopoiesis. *Exp Hematol* 30: 306–312.
  85. Tissir F, Goffinet AM (2006) Expression of planar cell polarity genes during development of the mouse CNS. *Eur J Neurosci* 23: 597–607.
  86. Tatemoto K (1982) Neuropeptide Y: complete amino acid sequence of the brain peptide. *Proc Natl Acad Sci U S A* 79: 5485–5489.
  87. Gehlert DR (1998) Multiple receptors for the pancreatic polypeptide (PP-fold) family: physiological implications. *Proc Soc Exp Biol Med* 218: 7–22.
  88. Pedrazzini T, Seydoux J, Kunstner P, Aubert JF, Grouzmann E, et al. (1998) Cardiovascular response, feeding behavior and locomotor activity in mice lacking the NPY Y1 receptor. *Nat Med* 4: 722–726.
  89. Bandoh K, Aoki J, Hosono H, Kobayashi S, Kobayashi T, et al. (1999) Molecular cloning and characterization of a novel human G-protein-coupled receptor, EDG7, for lysophosphatidic acid. *J Biol Chem* 274: 27776–27785.
  90. Senderek J, Bergmann C, Stendel C, Kirfel J, Verpoorten N, et al. (2003) Mutations in a gene encoding a novel SH3/TPR domain protein cause autosomal recessive Charcot-Marie-Tooth type 4C neuropathy. *Am J Hum Genet* 73: 1106–1119.
  91. Ferner RE, Hughes RA, Hall SM, Upadhyaya M, Johnson MR (2004) Neurofibromatous neuropathy in neurofibromatosis 1 (NF1). *J Med Genet* 41: 837–841.
  92. Kuorilehto T, Ekholm E, Nissinen M, Hietaniemi K, Hiltunen A, et al. (2006) NF1 gene expression in mouse fracture healing and in experimental rat pseudarthrosis. *J Histochem Cytochem* 54: 363–370.
  93. Vasiliauskas D, Hancock S, Stern CD (1999) SWIP-1: novel SOCS box containing WD-protein regulated by signalling centres and by Shh during development. *Mech Dev* 82: 79–94.
  94. Niu SL, Mitchell DC, Lim SY, Wen ZM, Kim HY, et al. (2004) Reduced G protein-coupled signaling efficiency in retinal rod outer segments in response to n-3 fatty acid deficiency. *J Biol Chem* 279: 31098–31104.
  95. Litman BJ, Niu SL, Polozova A, Mitchell DC (2001) The role of docosahexaenoic acid containing phospholipids in modulating G protein-coupled signaling pathways: visual transduction. *J Mol Neurosci* 16: 237–242; discussion 279–284.
  96. Mitchell DC, Niu SL, Litman BJ (2001) Optimization of receptor-G protein coupling by bilayer lipid composition I: kinetics of rhodopsin-transducin binding. *J Biol Chem* 276: 42801–42806.
  97. Niu SL, Mitchell DC, Litman BJ (2001) Optimization of receptor-G protein coupling by bilayer lipid composition II: formation of metarhodopsin II-transducin complex. *J Biol Chem* 276: 42807–42811.
  98. Tranebjaerg L, Hamel BCJ, Gabreels FJM, Renier WO, Van Ghelue M (2000) A de novo missense mutation in a critical domain of the X-linked DDP gene causes the typical deafness-dystonia-optic atrophy syndrome. *European Journal of Human Genetics* 8: 464–467.
  99. Hofmann S, Rothbauer U, Muhlenbein N, Neupert W, Gerbitz KD, et al. (2002) The C66W mutation in the deafness dystonia peptide 1 (DDP1) affects the formation of functional DDP1 center dot TIM13 complexes in the mitochondrial intermembrane space. *Journal of Biological Chemistry* 277: 23287–23293.
  100. Tranebjaerg L, Jensen PK, Van Ghelue M, Vnencak-Jones CL, Sund S, et al. (2001) Neuronal cell death in the visual cortex is a prominent feature of the X-linked recessive mitochondrial deafness-dystonia syndrome caused by mutations in the TIMM8a gene. *Ophthalmic Genet* 22: 207–223.
  101. Bernstein HG, Lendekel U, Bertram I, Bukowska A, Kanakis D, et al. (2006) Localization of neuregulin-1alpha (heregulin-alpha) and one of its receptors, ErbB-4 tyrosine kinase, in developing and adult human brain. *Brain Res Bull* 69: 546–559.
  102. Lopez-Bendito G, Cautinat A, Sanchez JA, Bielle F, Flames N, et al. (2006) Tangential neuronal migration controls axon guidance: a role for neuregulin-1 in thalamocortical axon navigation. *Cell* 125: 127–142.
  103. Dooley CM, James J, McGlade CJ, Ahmad I (2003) Involvement of Numb in vertebrate retinal development: Evidence for multiple roles of Numb in neural differentiation and maturation. *Journal of Neurobiology* 54: 313–325.
  104. Ishibashi M, Moriyoshi K, Sasai Y, Shiota K, Nakanishi S, et al. (1994) Persistent Expression of Helix-Loop-Helix Factor Hes-1 Prevents Mammalian Neural Differentiation in the Central-Nervous-System. *Embo Journal* 13: 1799–1805.
  105. Carlson EC, Liu CY, Chikama TI, Hayashi Y, Kao CWC, et al. (2005) Keratan, a cornea-specific keratan sulfate proteoglycan, is regulated by lumican. *Journal of Biological Chemistry* 280: 25541–25547.

106. Chakravarti S, Magnuson T (1995) Localization of Mouse Lumican (Keratan Sulfate Proteoglycan) to Distal Chromosome 10. *Mammalian Genome* 6: 367–368.
107. Beecher N, Chakravarti S, Joyce S, Meek KM, Quantock AJ (2006) Neonatal development of the corneal stroma in wild-type and lumican-null mice. *Invest Ophthalmol Vis Sci* 47: 146–150.
108. Quantock AJ, Meek KM, Chakravarti S (2001) An X-ray diffraction investigation of corneal structure in lumican-deficient mice. *Investigative Ophthalmology & Visual Science* 42: 1750–1756.
109. Li Z, Clarke MP, Barker MD, McKie N (2005) TIMP3 mutation in Sorsby's fundus dystrophy: molecular insights. *Expert Rev Mol Med* 7: 1–15.
110. Clarke M, Mitchell KW, Goodship J, McDonnell S, Barker MD, et al. (2001) Clinical features of a novel TIMP-3 mutation causing Sorsby's fundus dystrophy: implications for disease mechanism. *British Journal of Ophthalmology* 85: 1429–1431.
111. Kuehn MH, Hageman GS (1999) Expression and characterization of the IPM 150 gene (IMPG1) product, a novel human photoreceptor cell-associated chondroitin-sulfate proteoglycan. *Matrix Biology* 18: 509–518.
112. Mathers PH, Jamrich M (2000) Regulation of eye formation by the Rx and pax6 homeobox genes. *Cellular and Molecular Life Sciences* 57: 186–194.
113. Furukawa T, Mukherjee S, Bao ZZ, Morrow EM, Cepko CL (2000) rax, hes1, and notch1 promote the formation of Muller glia by postnatal retinal progenitor cells. *Neuron* 26: 383–394.
114. Leifert WR, Jahangiri A, McMurchie EJ (2000) Membrane fluidity changes are associated with the antiarrhythmic effects of docosahexaenoic acid in adult rat cardiomyocytes. *Journal of Nutritional Biochemistry* 11: 38–44.
115. Stillwell W, Wassall SR (2003) Docosahexaenoic acid: membrane properties of a unique fatty acid. *Chemistry and Physics of Lipids* 126: 1–27.
116. SanGiovanni JP, Chew EY (2005) The role of omega-3 long-chain polyunsaturated fatty acids in health and disease of the retina. *Progress in Retinal and Eye Research* 24: 87–138.
117. Ramoz N, Rueda LA, Bouadjar B, Montoya LS, Orth G, et al. (2002) Mutations in two adjacent novel genes are associated with epidermodysplasia verruciformis. *Nat Genet* 32: 579–581.
118. Davy BE, Robinson ML (2003) Congenital hydrocephalus in hy3 mice is caused by a frameshift mutation in Hydin, a large novel gene. *Human Molecular Genetics* 12: 1163–1170.
119. Yu S, Hao Y, Lowe AW (2004) Effects of GP2 expression on secretion and endocytosis in pancreatic AR4-2J cells. *Biochemical and Biophysical Research Communications* 322: 320–325.
120. Kuida K, Zheng TS, Na SQ, Kuan CY, Yang D, et al. (1996) Decreased apoptosis in the brain and premature lethality in CPP32-deficient mice. *Nature* 384: 368–372.
121. Jacobson MD, Weil M, Raff MC (1997) Programmed cell death in animal development. *Cell* 88: 347–354.
122. Dufner A, Pownall S, Mak TW (2006) Caspase recruitment domain protein 6 is a microtubule-interacting protein that positively modulates NF-kappaB activation. *Proc Natl Acad Sci U S A* 103: 988–993.
123. Narayanan BA, Narayanan NK, Reddy BS (2001) Docosahexaenoic acid regulated genes and transcription factors inducing apoptosis in human colon cancer cells. *Int J Oncol* 19: 1255–1262.
124. Dixon DA, Balch GC, Kederasha N, Anderson P, Zimmerman GA, et al. (2003) Regulation of cyclooxygenase-2 expression by the translational silencer TIA-1. *Journal of Experimental Medicine* 198: 475–481.
125. Su HP, Nakada-Tsukui K, Tosello-Trampont AC, Li Y, Bu G, et al. (2002) Interaction of CED-6/GULP, an adapter protein involved in engulfment of apoptotic cells with CED-1 and CD91/low density lipoprotein receptor-related protein (LRP). *Journal of Biological Chemistry* 277: 11772–11779.
126. Brady SC, Allan LA, Clarke PR (2005) Regulation of caspase 9 through phosphorylation by protein kinase C zeta in response to hyperosmotic stress. *Mol Cell Biol* 25: 10543–10555.
127. Sokac AM, Bement WM (2000) Regulation and expression of metazoan unconventional myosins. *International Review of Cytology—a Survey of Cell Biology*, Vol 200. pp 197–304.
128. Mothes H, Heidet L, Arrondel C, Richter KK, Thiele M, et al. (2002) Alport syndrome associated with diffuse leiomyomatosis: COL4A5-COL4A6 deletion associated with a mild form of Alport nephropathy. *Nephrol Dial Transplant* 17: 70–74.
129. Colville D, Savage J, Morfis M, Ellis J, Kerr P, et al. (1997) Ocular manifestations of autosomal recessive Alport syndrome. *Ophthalmic Genet* 18: 119–128.
130. Miki H, Sasaki T, Takai Y, Takenawa T (1998) Induction of filopodium formation by a WASP-related actin-depolymerizing protein N-WASP. *Nature* 391: 93–96.
131. Wu X, Suetsugu S, Cooper LA, Takenawa T, Guan JL (2004) Focal adhesion kinase regulation of N-WASP subcellular localization and function. *J Biol Chem* 279: 9565–9576.
132. Suetsugu S, Tezuka T, Morimura T, Hattori M, Mikoshiba K, et al. (2004) Regulation of actin cytoskeleton by mDab1 through N-WASP and ubiquitination of mDab1. *Biochemical Journal* 384: 1–8.
133. Goodison S, Urquidí V, Tarin D (1999) CD44 cell adhesion molecules. *Mol Pathol* 52: 189–196.
134. Wu Q, Maniatis T (1999) A striking organization of a large family of human neural cadherin-like cell adhesion genes. *Cell* 97: 779–790.
135. Wolfsberg TG, Straight PD, Gerena RL, Huovila APJ, Primakoff P, et al. (1995) Adam, a Widely Distributed and Developmentally-Regulated Gene Family Encoding Membrane-Proteins with a Disintegrin and Metalloprotease Domain. *Developmental Biology* 169: 378–383.
136. Wolfsberg TG, Primakoff P, Myles DG, White JM (1995) Adam, a Novel Family of Membrane-Proteins Containing a Disintegrin and Metalloprotease Domain—Multipotential Functions in Cell-Cell and Cell-Matrix Interactions. *Journal of Cell Biology* 131: 275–278.
137. Horiuchi K, Zhou HM, Kelly K, Manova K, Blobel CP (2005) Evaluation of the contributions of ADAMs 9, 12, 15, 17, and 19 to heart development and ectodomain shedding of neuregulins beta 1 and beta 2. *Developmental Biology* 283: 459–471.
138. Fambrough D, Pan DJ, Rubin GM, Goodman CS (1996) The cell surface metalloprotease disintegrin Kuzbanian is required for axonal extension in *Drosophila*. *Proceedings of the National Academy of Sciences of the United States of America* 93: 13233–13238.
139. Yagami-Hiromasa T, Sato T, Kurisaki T, Kamijo K, Nabeshima Y, et al. (1995) A metalloprotease-disintegrin participating in myoblast fusion. *Nature* 377: 652–656.
140. Buxbaum JD, Liu KN, Luo YX, Slack JL, Stocking KL, et al. (1998) Evidence that tumor necrosis factor alpha converting enzyme is involved in regulated alpha-secretase cleavage of the Alzheimer amyloid protein precursor. *Journal of Biological Chemistry* 273: 27765–27767.
141. Endres K, Postina R, Schroeder A, Mueller U, Fahrenholz F (2005) Shedding of the amyloid precursor protein-like protein APLP2 by disintegrin-metalloproteinases. *Febs J* 272: 5808–5820.
142. Jackson LF, Qiu TH, Sunnarborg SW, Chang A, Zhang CL, et al. (2003) Defective valvulogenesis in HB-EGF and TACE-null mice is associated with aberrant BMP signaling. *Embo Journal* 22: 2704–2716.
143. Peschon JJ, Slack JL, Reddy P, Stocking KL, Sunnarborg SW, et al. (1998) An essential role for ectodomain shedding in mammalian development. *Science* 282: 1281–1284.
144. Zhao J, Chen H, Peschon JJ, Shi W, Zhang Y, et al. (2001) Pulmonary hypoplasia in mice lacking tumor necrosis factor-alpha converting enzyme indicates an indispensable role for cell surface protein shedding during embryonic lung branching morphogenesis. *Dev Biol* 232: 204–218.
145. Van Eerdewegh P, Little RD, Dupuis J, Del Mastro RG, Falls K, et al. (2002) Association of the ADAM33 gene with asthma and bronchial hyperresponsiveness. *Nature* 418: 426–430.
146. Holgate ST, Holloway J, Wilson S, Howarth PH, Haitchi HM, et al. (2006) Understanding the pathophysiology of severe asthma to generate new therapeutic opportunities. *J Allergy Clin Immunol* 117: 496–506; quiz 507.
147. Haitchi HM, Powell RM, Shaw TJ, Howarth PH, Wilson SJ, et al. (2005) ADAM33 expression in asthmatic airways and human embryonic lungs. *Am J Respir Crit Care Med* 171: 958–965.
148. Tagawa K, Kunishita T, Maruyama K, Yoshikawa K, Kominami E, et al. (1991) Alzheimer's disease amyloid beta-clipping enzyme (APP secretase): identification, purification, and characterization of the enzyme. *Biochem Biophys Res Commun* 177: 377–387.
149. Felbor U, Kessler B, Mothes W, Goebel HH, Ploegh HL, et al. (2002) Neuronal loss and brain atrophy in mice lacking cathepsins B and L. *Proc Natl Acad Sci U S A* 99: 7883–7888.
150. Toomes C, James J, Wood AJ, Wu CL, McCormick D, et al. (1999) Loss-of-function mutations in the cathepsin C gene result in periodontal disease and palmoplantar keratosis. *Nat Genet* 23: 421–424.
151. Reznik SE, Fricker LD (2001) Carboxypeptidases from A to z: implications in embryonic development and Wnt binding. *Cell Mol Life Sci* 58: 1790–1804.
152. Liu Y, May NR, Fan CM (2001) Growth arrest specific gene 1 is a positive growth regulator for the cerebellum. *Dev Biol* 236: 30–45.
153. Brajenovic M, Joberty G, Kuster B, Bouwmeester T, Drewes G (2004) Comprehensive proteomic analysis of human Par protein complexes reveals an interconnected protein network. *J Biol Chem* 279: 12804–12811.
154. Wada W, Maeshima A, Zhang YQ, Hasegawa Y, Kuwano H, et al. (2004) Assessment of the function of the betaC-subunit of activin in cultured hepatocytes. *Am J Physiol Endocrinol Metab* 287: E247–254.
155. Wada W, Medina J, Hasegawa Y, Kuwano H, Kojima I (2005) Adenovirus-mediated overexpression of the activin betaC subunit accelerates liver regeneration in partially hepatectomized rats. *J Hepatol* 43: 823–828.
156. Tashvea ES, Ke A, Deng Y, Jun C, Takemoto IJ, et al. (2004) Differentially expressed genes in the lens of mimecan-null mice. *Mol Vis* 10: 403–416.
157. Dunley JR, Beales MP, Berryhill BL, Cornuet PK, Hassell JR (2000) Expression of the keratan sulfate proteoglycans lumican, keratocan and osteoglycin/mimecan during chick corneal development. *Exp Eye Res* 70: 349–362.
158. Madisen L, Neubauer M, Plowman G, Rosen D, Segarini P, et al. (1990) Molecular cloning of a novel bone-forming compound: osteoinductive factor. *Dev Cell Biol* 9: 303–309.
159. Ge G, Seo NS, Liang X, Hopkins DR, Hook M, et al. (2004) Bone morphogenetic protein-1/tolloid-related metalloproteinases process osteoglycin and enhance its ability to regulate collagen fibrillogenesis. *J Biol Chem* 279: 41626–41633.
160. Fang G, Yu H, Kirschner MW (1998) Direct binding of CDC20 protein family members activates the anaphase-promoting complex in mitosis and G1. *Mol Cell* 2: 163–171.

161. Moskovitz J, Weissbach H, Brot N (1996) Cloning the expression of a mammalian gene involved in the reduction of methionine sulfoxide residues in proteins. *Proc Natl Acad Sci U S A* 93: 2095–2099.
162. Moskovitz J, Jenkins NA, Gilbert DJ, Copeland NG, Jursky F, et al. (1996) Chromosomal localization of the mammalian peptide-methionine sulfoxide reductase gene and its differential expression in various tissues. *Proceedings of the National Academy of Sciences of the United States of America* 93: 3205–3208.
163. Moskovitz J (2005) Methionine sulfoxide reductases: ubiquitous enzymes involved in antioxidant defense, protein regulation, and prevention of aging-associated diseases. *Biochimica Et Biophysica Acta-Proteins and Proteomics* 1703: 213–219.
164. Moskovitz J, Bar-Noy S, Williams WM, Berlett BS, Stadtman ER (2001) Methionine sulfoxide reductase (MsrA) is a regulator of antioxidant defense and lifespan in mammals. *Proceedings of the National Academy of Sciences of the United States of America* 98: 12920–12925.
165. Levine RL, Moskovitz J, Stadtman ER (2000) Oxidation of methionine in proteins: Roles in antioxidant defense and cellular regulation. *Iubmb Life* 50: 301–307.
166. Picot CR, Petropoulos I, Perichon M, Moreau M, Nizard C, et al. (2005) Overexpression of MsrA protects WI-38 SV40 human fibroblasts against H<sub>2</sub>O<sub>2</sub>-mediated oxidative stress. *Free Radic Biol Med* 39: 1332–1341.
167. Storz P, Doppler H, Toker A (2005) Protein kinase D mediates mitochondrion-to-nucleus signaling and detoxification from mitochondrial reactive oxygen species. *Molecular and Cellular Biology* 25: 8520–8530.
168. Laity JH, Lee BM, Wright PE (2001) Zinc finger proteins: new insights into structural and functional diversity. *Curr Opin Struct Biol* 11: 39–46.
169. Winston JT, Koeppe DM, Zhu CH, Elledge SJ, Harper JW (1999) A family of mammalian F-box proteins. *Current Biology* 9: 1180–1182.
170. Kuroda H, Takahashi N, Shimada H, Seki M, Shinozaki K, et al. (2002) Classification and expression analysis of Arabidopsis F-box-containing protein genes. *Plant and Cell Physiology* 43: 1073–1085.
171. Dumstrei K, Nassif C, Abboud G, Aryai A, Aryai A, et al. (1998) EGFR signaling is required for the differentiation and maintenance of neural progenitors along the dorsal midline of the *Drosophila* embryonic head. *Development* 125: 3417–3426.
172. Kornblum HI, Hussain R, Wiesen J, Miettinen P, Zurcher SD, et al. (1998) Abnormal astrocyte development and neuronal death in mice lacking the epidermal growth factor receptor. *J Neurosci Res* 53: 697–717.
173. Louvi A, Artavanis-Tsakonas S (2006) Notch signalling in vertebrate neural development. *Nat Rev Neurosci* 7: 93–102.
174. Voas MG, Rebay I (2004) Signal integration during development: insights from the *Drosophila* eye. *Dev Dyn* 229: 162–175.
175. Jump DB, Clarke SD (1999) Regulation of gene expression by dietary fat. *Annual Review of Nutrition* 19: 63–90.
176. de Urquiza AM, Liu S, Sjoberg M, Zetterstrom RH, Griffiths W, et al. (2000) Docosahexaenoic acid, a ligand for the retinoid receptor in mouse brain. *Science* 290: 2140–2144.
177. Lapillonne A, Clarke SD, Heird WC (2004) Polyunsaturated fatty acids and gene expression. *Current Opinion in Clinical Nutrition and Metabolic Care* 7: 151–156.
178. Berger A, Mutch DM, German JB, Roberts MA (2002) Unraveling lipid metabolism with microarrays: effects of arachidonate and docosahexaenoate acid on murine hepatic and hippocampal gene expression. *Genome Biol* 3: PREPRINT0004.
179. Flachs P, Horakova O, Brauner P, Rossmel M, Pecina P, et al. (2005) Polyunsaturated fatty acids of marine origin upregulate mitochondrial biogenesis and induce beta-oxidation in white fat. *Diabetologia* 48: 2365–2375.
180. Berger A, Mutch DM, German JB, Roberts MA (2002) Dietary effects of arachidonate-rich fungal oil and fish oil on murine hepatic and hippocampal gene expression. *Lipids Health Dis* 1: 2.
181. Kitajka K, Puskas LG, Zvara A, Hackler L Jr, Barcelo-Coblijn G, et al. (2002) The role of n-3 polyunsaturated fatty acids in brain: modulation of rat brain gene expression by dietary n-3 fatty acids. *Proc Natl Acad Sci U S A* 99: 2619–2624.
182. Barcelo-Coblijn G, Hoggies E, Kitajka K, Puskas LG, Zvara A, et al. (2003) Modification by docosahexaenoic acid of age-induced alterations in gene expression and molecular composition of rat brain phospholipids. *Proc Natl Acad Sci U S A* 100: 11321–11326.
183. Puskas LG, Kitajka K, Nyakas C, Barcelo-Coblijn G, Farkas T (2003) Short-term administration of omega 3 fatty acids from fish oil results in increased transthyretin transcription in old rat hippocampus. *Proc Natl Acad Sci U S A* 100: 1580–1585.
184. Seth D, Leo MA, McGuinness PH, Lieber CS, Brennan Y, et al. (2003) Gene expression profiling of alcoholic liver disease in the baboon (*Papio hamadryas*) and human liver. *Am J Pathol* 163: 2303–2317.
185. Cox LA, Schlubritz-Loutsevitch N, Hubbard GB, Nijland MJ, McDonald TJ, et al. (2006) Gene expression profile differences in left and right liver lobes from mid-gestation fetal baboons: a cautionary tale. *J Physiol* 572: 59–66.
186. Bolstad BM, Irizarry RA, Astrand M, Speed TP (2003) A comparison of normalization methods for high density oligonucleotide array data based on variance and bias. *Bioinformatics* 19: 185–193.
187. Dennis G Jr, Sherman BT, Hosack DA, Yang J, Gao W, et al. (2003) DAVID: Database for Annotation, Visualization, and Integrated Discovery. *Genome Biol* 4: P3.
188. Calvano SE, Xiao WZ, Richards DR, Felciano RM, Baker HV, et al. (2005) A network-based analysis of systemic inflammation in humans. *Nature* 437: 1032–1037.
