# Supplementary material for: Differential Cerebral Cortex Transcriptomes of Baboon Neonates Consuming Moderate and High Docosahexaenoic Acid Formulas
Source: PLoS One. 2007 Apr 11;2(4):e370. doi: 10.1371/journal.pone.0000370 (PMC1847718; doi:10.1371/journal.pone.0000370)
Supplement: Table S2 — Probe sets showing ≥1.4 fold changes in gene expression (0.02 MB XLS) [file pone.0000370.s005.xls]

## Sheet: Table S2
Table S2: Probe sets showing ≥ 1.4 fold changes in gene expression
Affymetrix Probe ID No.	Gene Symbol	Expression change (Fold Changes):	Expression change (Fold Changes):
		L/C	L3/C
231628_s_at	SERPINB6	-1.45	4.588
231655_x_at	SERPINB6		1.811
1552719_at	H63		1.641
1564654_at	COL4A6		1.613
208137_x_at	ZNF611		1.578
210800_at	TIMM8A		1.564
233399_x_at	---		1.541
226134_s_at	MSI2	1.536
224105_x_at	---		1.521
238895_at	TEBP/// PTGES3		1.519
1560276_at	LOC283403		1.511
234788_x_at	FLJ13611		1.51
241867_at	PARP6		1.496
230867_at	LOC131873		1.495
212179_at	C6orf111		1.494
205745_x_at	ADAM17		1.49
233808_at	STK3		1.48
242273_at	---		1.48
216051_x_at	---		1.476
1553844_a_at	C10orf67		1.473
214768_x_at	---		1.47
215604_x_at	UBE2D2		1.465
215208_x_at	RPL35A		1.455
242391_at	---		1.453
224143_at	TTTY8		1.449
239199_at	---		1.446
238269_at	FBXL7		1.443
231538_at	C11orf1		1.442
244310_at	---		1.441
208844_at	VDAC3		1.426
221304_at	UGT1A10		1.421
235767_x_at	PHAX		1.419
234652_at	---		1.412
1554583_a_at	MGC50559		1.41
216600_x_at	ALDOB		1.406
235425_at	SGOL2		1.406
242016_at	LOC284409	1.404
216202_s_at	SPTLC2		1.401
234594_at	C14orf85		1.4
233868_x_at	ADAM33		1.4
227149_at	TNRC6C	1.4
1553641_a_at	TSGA13		-1.4
218575_at	ANAPC1		-1.405
234006_s_at	RP4-622L5		-1.405
229023_at	MGC5391		-1.407
203023_at	HSPC111		-1.408
216300_x_at	RARA		-1.41
221418_s_at	THRAP5		-1.414
244858_at	TGIF		-1.418
210764_s_at	CYR61		-1.419
223852_s_at	MGC4796		-1.421
206681_x_at	GP2		-1.421
222349_x_at	RNF126P1		-1.43
230117_at	LOC285878	-1.436
229118_at	PRRG3		-1.436
219088_s_at	ZNF576		-1.438
241399_at	FAM19A2		-1.441
209364_at	BAD		-1.447
202862_at	FAH		-1.465
244128_x_at	GLIS1		-1.481
205839_s_at	BZRAP1		-1.487
211534_x_at	PTPRN2		-1.49
221256_s_at	HDHD3		-1.491
223018_at	NOB1P		-1.498
204647_at	HOMER3		-1.502
224451_x_at	ARHGAP9		-1.536
205440_s_at	NPY1R	-1.556
237847_at	---		-1.56
238996_x_at	ALDOA		-1.621
203395_s_at	HES1		-1.631
220551_at	SLC17A6	-3.209	-1.867
