# Supplementary material for: Differential Cerebral Cortex Transcriptomes of Baboon Neonates Consuming Moderate and High Docosahexaenoic Acid Formulas
Source: PLoS One. 2007 Apr 11;2(4):e370. doi: 10.1371/journal.pone.0000370 (PMC1847718; doi:10.1371/journal.pone.0000370)
Supplement: Table S3 — Primers and Probe Sequences (0.02 MB XLS) [file pone.0000370.s006.xls]

## Sheet: Table S3
Table S3: Primers and Probe Sequences
Real Time PCR Primers and Probes TaqMan Assay
Gene Symbol	Forward Primer	Reverse Primer	TaqMan Probe
LUM	TGGGCAATCATCACCAAACTGT	ACATGGCACTTGGGTAGCTTT	CAGGGCAGTTACATTCT
TIMM8A	TGCACCAGATGACTGAACTTTGTT	AGCCCGACTGTCCAACTTTG	TCCATGCACTTCTCCC
ß-ACTIN	CCAGCACGATGAAGATCAAGATCA	GCCGCCGATCCACACA	CCTGAGCGCAAGTACT
SYBR Green Real Time-PCR Primers
Gene Symbol	Forward Primer	Reverse Primer
ATP8B1	ACCATTGCCTCTGCTCTTGT	TTCAACCGCTTGCGATGCTT
ADAM17	TGCTACTTGCAAAGGCGTGT	ACCCAACGATGTTGTCTGCT
NF1	TGCTGCAATTGCCTGTGTCA	TCCACAACCTTGCACTGCTT
FZD3	ACAGCAGCTTTGGCAATGGA	AATGTGGCCGAGAGGCAAAT
ZNF611	TTGTCAACAGGGCAAGGCAA	TGGGTGCTTCAAGGCCATTT
UCP2	AGCACCGTCAATGCCTACAA	AGGCAGAAGTGAAGTGGCAA
EGFR	TGCCAAGGCACGAGTAACAA	AGGAATTCGCTCCACTGTGT
ß-ACTIN	ATTGCCGACAGGATGCAGAA	AAGCATTTGCGGTGGACGAT
