# Supplementary material for: Differential Cerebral Cortex Transcriptomes of Baboon Neonates Consuming Moderate and High Docosahexaenoic Acid Formulas
Source: PLoS One. 2007 Apr 11;2(4):e370. doi: 10.1371/journal.pone.0000370 (PMC1847718; doi:10.1371/journal.pone.0000370)
Supplement: Table S4 — Comparison of microarray versus QRT-PCR gene expression values (Fold-changes) (0.01 MB XLS) [file pone.0000370.s007.xls]

## Sheet: Table S4
Table S4: Comparison of microarray versus QRT-PCR gene expression values (Fold-changes)
Gene Name	Microarray	QRT-PCR	Microarray	QRT-PCR
	L/C	L/C	L3/C	L3/C
Lumicam (LUM)	1.03	4.18	1.3	6.04
Translocase of inner mitochondrial membrane 8 homolog A (TIMM8A)	1.04	1.33	1.57	1.76
ATPase, Class I, type 8B, member 1 (ATP8B1)	1.28	1.13	1.36	1.2
ADAM metallopeptidase domain 17 (ADAM17)	1.37	1.95	1.5	2.66
Neurofibromin 1 (NF1)	1.03	2.07	1.2	2.16
Frizzled homolog 3 (FZD3)	1.13	1.8	1.2	2.58
Zinc finger protein 611 (ZNF611)	1.1	1.46	1.6	3.25
Uncoupling protein 2 (UCP2)	1.16	2.18	1.3	3.82
Epidermal growth factor receptor (EGFR)	-1.08	-1.2	1.17	1.4
