# Supplementary material for: Differential Cerebral Cortex Transcriptomes of Baboon Neonates Consuming Moderate and High Docosahexaenoic Acid Formulas
Source: PLoS One. 2007 Apr 11;2(4):e370. doi: 10.1371/journal.pone.0000370 (PMC1847718; doi:10.1371/journal.pone.0000370)
Supplement: Table S6 — Ingenuity functional network analysis (0.07 MB XLS) [file pone.0000370.s009.xls]

## Sheet: Table S6
Table S6: Ingenuity functional network analysis
Brain Networks: L/C
ID	Genes in Network	Score	Focus Genes	Top Categories
1	ACTL6A, ADAM17, ADRA1A, CD44, CTSB, DDAH1, EDG7, EGFR, FGF7, GNRHR, HAP1, HES1, IFITM2, LETMD1, LUM, MAP4K1, MDM2, NF1, NRG1, NUMB, PDE3A, PERP, PLCE1, PPP3CA, RGS16, SFTPB, SFTPC, SH3D19, SMARCA4, SMARCD2, SMARCE1, SOAT1, TIMP3, UBE2D2, VAV3	49	35	Cellular Development, Nervous System Development and Function, Cellular Growth and Proliferation
2	ALDOB, BAD, BLR1, BRCA1, CASP9, CD40, COL4A2, CR2, CYR61, FTH1, GATA4, GH1, GHRHR, GRP, GSR, GSTA3, HHEX, HNF4A, LEP, NFE2L2, NSMAF, PHLDA1, POU2F1, PRKAA1, PTPRB, RARA, RPS6KB1, SERPINA1, SHMT2, SLC2A1, STC1, TCF2, TIE1, VMD2, WASL	49	35	Organismal Injury and Abnormalities, Organismal Survival, Cell Death
3	ALDOA, BCLAF1, CRAMP1L, CRSP4, CRSP5, CRSP7, HEY1, ITGA2, KIAA0992, LIG3, LLGL1, MCF2, MCP, MYCN, NEIL1, NUDCD3, PARD6B, PARP2, PDRG1, POLB, PPARBP, PRKAA1, PRKAB1, PRKAG2, RDX, RPL11, RPL35A, STK11, TARS, TCF3, TCOF1, TERF2, THRAP5, TP53, VIL2	18	20	Gene Expression, Cell Cycle, Cellular Assembly and Organization
4	APLN, CAMK2G, CASP8, CHUK, COL9A1, COL9A2, COL9A3, ESRRBL1, FER (tyrosine kinase), FGF2, FGFR3, FLT1, GBP1, GNA14, GRIA1, GRIA3, HIP1, IL19, IL20RA, MAP2K5, MAP3K2, MAP3K3, MAPK12, NOS3, NOV, PLAG1, PLEC1, RNASEH1, SOCS4, STAT3, TIMP3, TRAF7, TSHR, UGT2B15, WNK1	15	18	Cell Death, Cardiovascular System Development and Function, Cell Morphology
5	ACPP, ALPP, ASB6, CCR7, CMIP, CRLF2, DDEF2, EEA1, FGF5, FRS2, GRB10, IL7R, INSR, KDR, LTC4S, MAP4K1, MMP11, MXI1, PAK2, PTPRG, RBM14, SFRS5, SIAH1, SLC20A1, SRC, STX6, TCEB1, TCF1, TGFB1, TGFB3, TGIF, UGT1A8, UGT1A10, VEGFC, ZFYVE9	14	17	Cellular Growth and Proliferation, Cardiovascular System Development and Function, Cellular Development
6	AR, BRF1, C20orf14, CBX5, CDC6, CDH1, CDK9, CDKN2C, DOK3, GLCCI1, GMNN, GTF3C2, IL2, JUB, MED12, NCOA6, NCR2, ORC1L, ORC3L, ORC4L, ORC5L, ORC6L, PAX5, PDIA2, POU2F2, PSMD10, PVRL2, RB1, SNAPC1, TBN, TBP, TCF3, TCP10, THRAP4, UTF1	14	17	DNA Replication, Recombination, and Repair, Gene Expression, Cell Cycle
7	AHR, ANAPC1, ANAPC2, ANAPC4, ANAPC7, ANAPC10, ARHGAP4, BAPX1, BICD1, BMP2, BMP6, CCNG1, CCNT1, CDC2, CDC16, CDC23, CHRDL2, CYP1A2, ETV6, FLII, GREM1, HBB, HBQ1, HEY1, IHH, MLLT10, PHOX2A, POSTN, SMARCB1, SOSTDC1, SS18, TACC2, TCF21, TP73L, YEATS4	14	17	Cell Signaling, Cell Morphology, Skeletal and Muscular System Development and Function
8	ABTB1, AKT2, ARHGDIA, BUB3, BUB1B, CCND3, CDC6, CDC20, CDK9, CDKN2B, CORO2B, CSN2, CUL1, FBXW8, FCGR2B, FOXM1, IGF2, MAD2L1, MYBL2, NEK1, OGN, PDCD4, PTEN, RAX, RGS16, RRM1, SAT, SKP2, SLC20A1, SLC2A4, SMOX, STK6, STX4A, STXBP4, TLE2	13	16	Cell Cycle, Cancer, DNA Replication, Recombination, and Repair
9	BCL2A1, C19orf10, CD14, CD36, CD58, CD81, CD79A, CHD2, CTSK, FCGR2A, GATM, HGF, IGHG1, IGHM, IL4, ITGB7, KIT, MAOA, MRPS10, PHB, PLCG1, POU2AF1, PRKCQ, PRKDC, PTPRC, RASA1, SAMSN1, SERPINB6, SLC26A4, SYNGR2, TFCP2, TG, TLR2, TNFRSF1A, TNK1	11	15	Cell-To-Cell Signaling and Interaction, Immunological Disease, Cellular Growth and Proliferation
10	ABI1, ACSL3, APC, CKM, DCTN2, DLG1, ELL, EPS8L2, FAT2, GADD45A, GART, GPS2, GSN, HMGB1, KLK3, KRAS, MDM2, MPP6, MTMR2, NR3C2, PIAS1, PIAS2, PIAS4, PLAGL1, PRKAR2A, SATB2, SOS1, TBL1X, THRB, TNFRSF10A, TNFRSF10B, TP53, TP73L, TWIST1, UBE2I	11	15	Gene Expression, Cancer, Cell Death
11	AKAP13, BIRC3, CALCA, CFTR, COL1A1, COL1A2, CSF1R, CYB561, CYP24A1, FASN, GNA12, GNA13, IFNA1, IFNG, IL1R1, IL31RA, MIF, MMP13, MTPN, MX2, NPY, NPY1R, OTP, PTH, PTHR2, PTPN11, SH2D1A, SIGLEC11, SLAMF1, TGFB2, TLR7, TSHR, UBE2E1, VDR, ZFX	11	15	Tissue Morphology, Connective Tissue Development and Function, Skeletal and Muscular System Development and Function
12	ACTN4, APC, APS, BTRC, BZRAP1, CALD1, CCK, CPT2, CTNNB1, DBI, DNTT, EDIL3, FUBP1, ID3, IL7, LEF1, MMP7, MYC, NOL5A, NOTCH1, PHF5A, PSMC5, PSMD6, RARA, RUVBL1, SCEL, SFRP2, SIAHBP1, SKP2, SNRP70, SNRPN, TNC, TPD52, TPM1, TPP2	11	15	Gene Expression, Cancer, Cell Morphology
13	ACVR1, ADIPOQ, CAMK2D, CFC1, CKM, CYB5, DCK, HBP1, IGFALS, IGFBP5, INHBA, INHBB, INHBC, INHBE, Ins1, IRX1, LRP1, MARCKS, MEF2A, MYO5A, MYOD1, PAPPA, PLA2G6, PRKCA, RAB27A, RPS6KA2, SFPQ, SMAD7, SOX7, STX4A, TCF3, TOP1, UCP2, UQCRC1, UQCRC2	11	15	Gene Expression, Cellular Development, Reproductive System Development and Function
14	AKT1, APOC3, BAD, C1QG, CDC42, CDGAP, CDX1, CEBPD, DLAT, EDG1, FOXG1B, GAS, GRP, ITSN2, KRIT1, KRT10, NEXN, PDHA1, PDK3, PEA15, PHB, PPP2R1A, PPP2R3A, RAP1A, RBL1, RICS, RPS6KA1, RPS6KB1, RSN, SLC18A2, SMAD3, TGIF2, VAV2, WAS, ZNF198	11	15	Cell Cycle, Cellular Growth and Proliferation, Cellular Assembly and Organization
15	CALCA, CCL1, CCL3, CEBPA, CLEC11A, COL18A1, CUL2, EXT1, HDAC3, HIF1A, IFIH1, IFNA2, IFNB1, IRF1, KDR, NEDD8, NRP1, OAS2, OASL, RCP9, SCUBE1, SCUBE3, SEMA3A, SEMA3D, SEMA3E, SLC12A6, SMAD2, SMAD3, SOCS1, TGIF, TNF, ULBP2, WNT10A, WTAP, ZBTB11	10	14	Cellular Function and Maintenance, Immune Response, Cellular Movement
16	ACP5, AKAP13, AP3B1, AP3B2, AP3D1, AP3M1, AP3M2, AP3S1, AP3S2, C8G, CAPN1, CSTF2, CTSK, GRB10, IL6R, LISCH7, LRRC17, MECT1, MITF, NCBP2, NOG, PAX3, PHLDB2, PPP1R7, RACGAP1, SFN, TBC1D4, TFE3, TIA1, TM4SF8, TNFSF11, TRPM1, TYRP1, YWHAE, YWHAG	10	14	Cellular Assembly and Organization, Nervous System Development and Function, Developmental Disorder
17	ARNTL2, BAD, BCL2L11, BRD4, CARD4, CARD6, CD14, CHEK1, CMA1, ELP3, ELP4, ELP5, ELP6, GZMA, HOMER3, HUS1, IL3, IL6, IL13, IL15RA, IL1R1, IL1R2, NFATC3, RAD1, RAD17, RBPSUH, Recc5, RIPK2, SPRR2B, SSA2, STATIP1, TLK1, TLR2, TYK2, XBP1	10	14	Cellular Development, Hematological System Development and Function, Immune and Lymphatic System Development and Function
18	APAF1, B2M, BAX, BBC3, BCL2L1, BCL2L11, BNIP1, CDKN1B, CIAPIN1, CMA1, CTSC, CYR61, ETV5, FABP5, FLT1, FLT3, GAS6, GDF11, GFI1, HFE, IL16, KITLG, MFN1, NOX1, PPIL5, PPP1R12B, S100A7, TEBP, TERT, TNFSF13, VDAC1, VDAC3, VEGF, YWHAQ, ZNF207	10	14	Cell Cycle, Cancer, Cell Death
19	BTRC, CCNT1, CDK9, CUL1, EED, EZH2, FAM19A2, FMR1, IL6ST, KLK6 (human), MBP, MMP7, MTPN, MYBL2, MYC, NFYA, NFYB, PCGF2, PLEKHE1, PLP1, PTPRC, PTPRG, RAB3A, RBBP4, RBBP7, RPH3AL, RSAFD1, SIRT1, SKP2, STK3, SUZ12, TAF9, TBC1D22A, TPM1, ZNF611	9	13	Gene Expression, Cancer, Cell Cycle
20	76P, AGT, AKAP1, AKAP8, AKAP9, ANK1, BYSL, CACNA1S, DHX8, HOXA9, IGF1, KL, KRT18, MEIS1, MYH6, PBX2, PBXIP1, PCNT2, PDE4D, PKNOX1, PRKACA, PRKAR1A, PRKAR2A, PRKAR2B, PTPRN2, SLC4A1, TRO, TROAP, TRPV2, TUBG1, TUBGCP2, TUBGCP3, TUBGCP5, TUBGCP6, WSB1	9	13	Cellular Assembly and Organization, Cellular Function and Maintenance, Cell Death
21	ADCY2, AMBP, BRF1, CDK5R1, CTF1, CTH, EPGN, ESR1, FLJ30655, FOS, FURIN, GAS1, GCG, GCGR, GTF3C1, GTF3C2, GTF3C5, MAPK1, MRC2, MTA3, NEFH, NPPC, NR2F1, OGT, PELP1, PKP2, PLAU, POLR3A, POLR3C, POLR3F, PPP1CB, RPS6KA2, RPS6KA3, SCIN, SSB	8	12	Cancer, Skeletal and Muscular Disorders, Tumor Morphology
22	ANXA3, ANXA6, ARF6, EDN1, FAF1, FDFT1, HRAS, HSPA8, HSPB1, HSPCA, IPO9, M-RIP, MAPK12, MAPKAPK2, MARCKSL1, MMP13, PACRG, PARK2, PDIA6, PPP1CA, PPP1R12A, PRNP, RAVER1, SCNN1A, SCNN1B, SCNN1G, SERPINB2, STIP1, STUB1, TCP1, TIMP3, UBE2G2, VCL, VIM, WWP2	8	12	Cardiovascular Disease, Genetic Disorder, Respiratory Disease
23	CD84, CD8B1, DNAH1, DNAH5, DNAH8, EGR2, EXOSC1, EXOSC2, EXOSC3, EXOSC4, EXOSC5, EXOSC6, EXOSC7, EXOSC8, EXOSC9, EXOSC10, FYN, GAB2, GLRA1, GLRA2, GLRA3, Glra4, GLRB, H2AFY, IL15, IL7R, LCK, MR1 (H2ls), NAB1, P2RX1, P2RX2, POLR2C, PTPN5, SH2D1A, TCTEL1	8	12	Cellular Development, Hematological System Development and Function, Immune and Lymphatic System Development and Function
24	CANX, CASC3, CD3D, CD3Z, CDH3, CENTG2, CLCN1, DPYD, GUCB2, GUCY1A2, GUCY1A3, GUCY1B2, GUCY1B3, GUCY2C, GUCY2E (olfactory-specific), GUCY2F, KCNK3, MAGOH, NAALAD2, NXF1, NXF2, NXT1, NXT2, PDLIM4, RBM8A, SIM1, SYT7, SYVN1, TCRIM, THOC4, TLE1, TRA@, TRB@, TRD@, WDR48	8	12	Gene Expression, Molecular Transport, RNA Trafficking
25	DERL1, VCP	1	1	Protein Degradation, Protein Synthesis, Cellular Assembly and Organization
26	COCH, LTBR	1	1	Auditory Disease, Cell-To-Cell Signaling and Interaction, Digestive System Development and Function
27	CLPS, PNLIP	1	1	Lipid Metabolism, Small Molecule Biochemistry, Vitamin and Mineral Metabolism
28	EMP2, P2RX7	1	1	Cell Death, Renal and Urological Disease, Cell-To-Cell Signaling and Interaction
29	SPTLC1, SPTLC2	1	1	Genetic Disorder, Neurological Disease, Lipid Metabolism
30	MYO1A, MYO1B	1	1	Cellular Assembly and Organization, Cell Morphology
31	ARL6, ARL6IP2	1	1	Developmental Disorder, Genetic Disorder, Neurological Disease
32	HSPB2, HSPB3	1	1	Cellular Compromise, Renal and Urological Disease, Cell-To-Cell Signaling and Interaction
33	NEK2, NEK11	1	1	Cancer, Cell Cycle, Cell Morphology
34	CLK4, UBL5	1	1	Post-Translational Modification, Amino Acid Metabolism, Small Molecule Biochemistry
35	S100P, S100Z	1	1	Cancer, Cellular Movement, Respiratory Disease
36	CDC7, DRF1	1	1	Cell Cycle, Cellular Assembly and Organization, Cellular Development
37	FNTA, FNTB	1	1	Amino Acid Metabolism, Post-Translational Modification, Small Molecule Biochemistry
38	CSHL1, MAML1	1	1	Gene Expression, Cell Signaling
39	GP2, SYCN	1	1	Cellular Function and Maintenance
40	CBFA2T3, HDAC8, RUNX1T1	1	1	Cellular Development, Hematological System Development and Function, Immune and Lymphatic System Development and Function
41	CTBP1, FOXP1, FOXP2, FOXP4	1	1	Gene Expression, Cardiovascular System Development and Function, Cellular Compromise
Brain Networks: L3/C
ID	Genes in Network	Score	Focus Genes	Top Categories
1	ACTL6A, ADAM17, ADRA1A, CD44, CTSB, DDAH1, EDG7, EGFR, FGF7, GNRHR, HAP1, HES1, IFITM2, LETMD1, LUM, MAP4K1, MDM2, NF1, NRG1, NUMB, PDE3A, PERP, PLCE1, PPP3CA, RGS16, SFTPB, SFTPC, SH3D19, SMARCA4, SMARCD2, SMARCE1, SOAT1, TIMP3, UBE2D2, VAV3	49	35	Cellular Development, Nervous System Development and Function, Cellular Growth and Proliferation
2	ALDOB, BAD, BLR1, BRCA1, CASP9, CD40, COL4A2, CR2, CYR61, FTH1, GATA4, GH1, GHRHR, GRP, GSR, GSTA3, HHEX, HNF4A, LEP, NFE2L2, NSMAF, PHLDA1, POU2F1, PRKAA1, PTPRB, RARA, RPS6KB1, SERPINA1, SHMT2, SLC2A1, STC1, TCF2, TIE1, VMD2, WASL	49	35	Organismal Injury and Abnormalities, Organismal Survival, Cell Death
3	ALDOA, BCLAF1, CRAMP1L, CRSP4, CRSP5, CRSP6, CRSP7, CRSP9, ITGA2, KIAA0992, MCF2, MCP, MYCN, NEIL1, NET1, NUDCD3, NUT2, PARD6B, PDRG1, POLB, PPARBP, PRKAA1, PRKAB1, PRKAG2, RPL11, RPL35A, STK11, TARS, TCF3, TCOF1, TERF2, THRAP1, THRAP5, TP53, VIL2	18	20	Gene Expression, Cell Signaling, Cell Cycle
4	AR, BAG1, BRF1, C20orf14, CDH1, CDK7, CDK9, CDKN2C, DOK3, GLCCI1, GMNN, GTF3C2, HIST2H3C, IL2, ITGB7, JUB, MED12, NCOA6, NCR2, ORC1L, ORC3L, ORC4L, ORC5L, ORC6L, PDIA2, POU2F2, PSMD10, PVRL2, RB1, TBN, TBP, TCF3, TCP10, THRAP4, UTF1	15	18	Gene Expression, DNA Replication, Recombination, and Repair, Cell Cycle
5	ACPP, ALPP, ASB6, CCR7, CDX2, CMIP, CRLF2, CTSB, CXCR3, DDEF2, EEA1, FGF5, FRS2, GRB10, IER2, INSR, LTC4S, MMP11, MXI1, PTPRA, PTPRG, RAD51, RBM14, SFRS5, SLC20A1, SPTAN1, SRC, STX6, TCF1, TGFB1, TGIF, UGT1A8, UGT1A10, VEGFC, ZFYVE9	14	17	Cellular Growth and Proliferation, Hepatic System Development and Function, Tissue Morphology
6	APLN, CAMK2G, CASP4, CASP8, CHUK, COL9A2, COL9A3, ESRRBL1, FGF2, GNA14, GRIA1, GRIA3, HIP1, HSPCA, HSPCB, IL19, IL24, IL20RA, IL20RB, IL8RB, MAP2K5, MAP3K2, MAP3K3, MAPK12, MEF2D, NOS3, NOV, PLAG1, PLEC1, RNASEH1, SOCS4, STAT3, TRAF7, UGT2B15, WNK1	14	17	Gene Expression, Cardiovascular Disease, Hematological System Development and Function
7	AHR, ANAPC1, ANAPC2, ANAPC4, ANAPC5, ANAPC7, ANAPC10, ANAPC11, ARHGAP4, BAPX1, BICD1, BMP2, CDC2, CDC7, CDC16, CDC23, CHRDL2, CYP1A2, ETV6, FLII, HBB, Hbb-ar, Hbb-bh1, HBD, HBQ1, MLLT10, PHOX2A, POSTN, SMARCB1, SOSTDC1, SS18, TACC2, TCF21, TP73L, YEATS4	14	17	Cell Cycle, Cell Signaling, Renal and Urological System Development and Function
8	ABTB1, ARHGDIA, BUB3, BUB1B, CCND3, CDC20, CDC25A, CDK9, CDKN1C, CORO2B, CSN2, CUL1, FBXW8, FCGR2B, FOXM1, IDH1, IGF2, INPPL1, MAD2L1, NEK1, NRG2, OGN, PDCD4, PDGFB, PTEN, RAX, RGS16, RRM1, SLC20A1, SLC2A4, SMOX, STK6, STXBP4, TF, TLE2	13	16	Cell Cycle, Cellular Assembly and Organization, Cancer
9	BCL3, C19orf10, CCL11, CD14, CD36, CD58, CD81, CD79A, CHD2, FCGR2A, GATM, GP5, HGF, Igh-3, IGHG1, IGHG3, IGHM, IL4, INPP5D, ITGB7, KHDRBS1, MAOA, MRPS10, PLCG1, PLCG2, PRDM1, PTPRC, SAMSN1, SERPINB6, SLC26A4, SYNGR2, TFCP2, TG, TLR2, TNK1	11	15	Cell-To-Cell Signaling and Interaction, Immunological Disease, Cellular Development
10	AGC1, AKAP13, BGLAP, CFTR, COL1A2, CSF1R, CTLA4, CYB561, CYP24A1, FCGR2B, GNA12, GNA13, Ifna, IFNA1, IFNG, IL31RA, INPP5D, MIF, MX2, NPY, NPY1R, OTP, PECAM1, PTH, PTHR2, PTPN11, SH2D1A, SIGLEC11, SLAMF1, STAT4, TLR7, TSHR, UBE2E1, VDR, ZFX	11	15	Immunological Disease, Inflammatory Disease, Cellular Growth and Proliferation
11	ACTN4, BTRC, BZRAP1, CALD1, CPT2, CTNNB1, DBI, DNTT, EDIL3, FUBP1, GCK, ID3, LGALS3, LMNA, MMP7, MYC, NOL5A, NOTCH1, PHF5A, PIN1, POLR2A, PSMC4, PSMC5, PSMD6, RARA, RUVBL1, SCEL, SFRP2, SIAHBP1, SNRP70, SNRPN, TNC, TPD52, TPM1, TPP2	11	15	Cellular Development, Cellular Growth and Proliferation, Cancer
12	ACVR1, ACVR2B, ADIPOQ, CFC1, CKM, CYB5, DCK, HBP1, IGFALS, IGFBP5, INHA, INHBA, INHBB, INHBC, INHBE, Ins1, IRX1, MARCKS, MEF2A, MYO5A, MYOD1, PAPPA, PLA2G6, PRKCA, RAB27A, RPS6KA2, SFPQ, SMAD7, SOX7, TCF3, TOP1, UCP2, UCP3, UQCRC1, UQCRC2	11	15	Lipid Metabolism, Molecular Transport, Small Molecule Biochemistry
13	CALCA, CCL1, CLEC11A, COL18A1, CUL2, EXT1, HDAC1, HDAC3, HIF1A, IFIH1, IFNB1, IRF1, KDR, MMP2, NEDD8, NOS1, NRP1, OAS2, OASL, RCP9, SCUBE1, SCUBE3, SEMA3A, SEMA3D, SEMA3E, SLC12A6, SMAD2, SMAD3, SOCS1, TGIF, TNF, ULBP2, WNT10A, WTAP, ZBTB11	10	14	Cardiovascular System Development and Function, Organismal Development, Organismal Survival
14	ABI1, ACSL3, BAK1, CCND3, CKM, DCTN2, DLG1, ELL, EPS8L2, FAT2, GADD45A, GART, GPS2, GSN, KLK3, KRAS, MDM2, MPP6, MTMR2, NR3C2, PACSIN1, PIAS1, PIAS2, PIAS4, PLAGL1, PRKAR2A, RARB, SATB2, SOS1, SUMO1, TBL1X, TNFRSF10A, TNFRSF10B, TP53, TWIST1	10	14	Cancer, Cell Death, Skeletal and Muscular Disorders
15	AKAP13, AP3B1, AP3B2, AP3D1, AP3M1, AP3M2, AP3S1, AP3S2, C8G, CEBPD, CPSF3, CSTF2, CTSK, GRB10, GTF2H1, Hnrpfl, LISCH7, LRRC17, MECT1, MITF, NCBP1, NCBP2, PAX3, PHLDB2, PPP1R7, RACGAP1, SFN, TBC1D4, TFE3, TIA1, TM4SF8, TNFSF11, TRPM1, YWHAE, YWHAG	10	14	Cellular Assembly and Organization, Nervous System Development and Function, Developmental Disorder
16	B2M, BAX, BCL2L1, BIK, BNIP1, BNIP3, CDC25C, CDKN1B, CIAPIN1, CTSC, CYR61, ETV4, ETV5, FABP5, FLT3, GAS6, GDF11, GFI1, HFE, IL16, IL24, KITLG, MFN1, NOX1, NR3C2, PPIL5, PPP1R12B, S100A7, TEBP, TERT, TNFSF13, VDAC1, VDAC3, VEGF, ZNF207	10	14	Cancer, Cell Cycle, Cell Death
17	AKT1, APOC3, BAD, C1QG, CDC42, CDGAP, CDKN1C, CDX1, DLAT, E2F5, FOXG1B, GAS, IQGAP1, ITSN2, KRIT1, KRT10, NEXN, PDHA1, PDK3, PEA15, PKN1, PPP2R1A, PPP2R3A, RAP1A, RAPGEF1, RBL1, RICS, RPS6KB1, RSN, SLC18A2, SMAD3, TGIF2, VAV2, WAS, ZNF198	10	14	Cell Cycle, Cellular Assembly and Organization, Cancer
18	ASXL1, ASXL2, CBX2, CBX8, CDK9, E2F6, EED, EZH2, FAM19A2, FMR1, KIAA1713, KLK6 (human), MBP, MYC, NFYA, NFYB, PCGF1, PCGF2, PCGF6, PHF19, PLEKHE1, PLP1, PTPRG, RAB3A, RING1, RNF2, RPH3AL, RPS7, RSAFD1, SIRT1, STK3, SUZ12, TBC1D22A, TPM1, ZNF611	9	13	Gene Expression, Cell Cycle, Neurological Disease
19	76P, AGT, AKAP6, AKAP8, AKAP9, ANK1, BYSL, CACNA1S, DHX8, HOXA9, HSD11B1, IGF1, INPPL1, KL, KRT18, MEIS1, MYH6, PBX2, PBXIP1, PCNT2, PDE4D, PKNOX1, PRKACA, PRKAR2A, PTPRN2, SLC4A1, TRO, TROAP, TRPV2, TUBG1, TUBGCP2, TUBGCP3, TUBGCP5, TUBGCP6, WSB1	9	13	Cellular Assembly and Organization, Cellular Function and Maintenance, Cell Death
20	ADCY2, ADRB3, AMBP, BRF1, CTH, EPGN, ESR1, FLJ30655, FOS, FURIN, GAS1, GCG, GCGR, GRM5, GTF3C1, GTF3C2, GTF3C5, MAPK1, MRC2, MTA3, NEFH, NPPC, OGT, PELP1, PKP2, PLAU, POLR3A, POLR3C, POLR3F, PPP1CB, PPP2R2A, RPS6KA3, SCIN, SSB, WEE1	8	12	Cancer, Skeletal and Muscular Disorders, Tumor Morphology
21	ACOX1, ADORA2B, ARNTL2, BRD4, CARD4, CARD6, CCL6, CHEK1, CTSG, ELP3, ELP4, ELP5, ELP6, GADD45B, GP5, GZMA, HOMER3, IGJ, IKBKAP, IL3, IL6, IL13, IL15RA, IL1R1, IL1R2, NFATC3, NMU, RAD1, RAD17, RIPK2, SPRR2B, SSA2, STATIP1, TLK1, TNFSF4	8	12	Cell-To-Cell Signaling and Interaction, Hematological System Development and Function, Immune Response
22	ANXA3, ANXA6, ARF6, CFTR, EDN1, FAF1, FDFT1, HRAS, HSPA8, HSPB1, HSPCA, IPO9, M-RIP, MAPK12, MAPKAPK2, MARCKSL1, NPPB, PACRG, PARK2, PDIA6, PPP1CA, PPP1R12A, PRNP, RAVER1, RPS3, SCNN1A, SERPINB2, SOD1, STIP1, STUB1, TCP1, TIMP3, UBE2G2, VCL, WWP2	8	12	Post-Translational Modification, Protein Folding, Cell Death
23	CD84, CD8B1, DNAH1, EGR2, EXOSC1, EXOSC2, EXOSC3, EXOSC4, EXOSC5, EXOSC7, EXOSC8, EXOSC9, EXOSC10, FYN, GAB2, GLRA1, GLRA2, GLRA3, Glra4, GLRB, H2AFY, IL15, LCK, MR1 (H2ls), NAB1, P2RX1, P2RX2, P2RX3, P2RX5, P2RXL1, POLR2C, POLR2K, PTPN5, SH2D1A, TCTEL1	8	12	Cellular Development, Hematological System Development and Function, Immune and Lymphatic System Development and Function
24	CANX, CASC3, CD3D, CD3G, CD3Z, CDH3, CENTG2, CLCN1, DPYD, GUCB2, GUCY1B2, GUCY1B3, GUCY2C, GUCY2E (olfactory-specific), GUCY2F, KCNK3, NAALAD2, NXF1, NXF2, NXT2, PDLIM4, RBM8A, SIM1, SYT7, SYVN1, Tcra-V14 (MGI:98561), Tcrb-v8.2, Tcrd, TCRIM, TLE1, TRA@, TRB@, TRD@, TRG@, WDR48	8	12	Lipid Metabolism, Small Molecule Biochemistry, Cellular Development
25	DERL1, VCP	1	1	Protein Degradation, Protein Synthesis, Cellular Assembly and Organization
26	COCH, LTBR	1	1	Auditory Disease, Cell-To-Cell Signaling and Interaction, Digestive System Development and Function
27	CLPS, PNLIP	1	1	Lipid Metabolism, Small Molecule Biochemistry, Vitamin and Mineral Metabolism
28	EMP2, P2RX7	1	1	Cell Death, Renal and Urological Disease, Cell-To-Cell Signaling and Interaction
29	SPTLC1, SPTLC2	1	1	Genetic Disorder, Neurological Disease, Lipid Metabolism
30	MYO1A, MYO1B	1	1	Cellular Assembly and Organization, Cell Morphology
31	ARL6, ARL6IP2	1	1	Developmental Disorder, Genetic Disorder, Neurological Disease
32	HSPB2, HSPB3	1	1	Cellular Compromise, Renal and Urological Disease, Cell-To-Cell Signaling and Interaction
33	NEK2, NEK11	1	1	Cancer, Cell Cycle, Cell Morphology
34	CLK4, UBL5	1	1	Post-Translational Modification, Amino Acid Metabolism, Small Molecule Biochemistry
35	S100P, S100Z	1	1	Cancer, Cellular Movement, Respiratory Disease
36	CDC7, DRF1	1	1	Cell Cycle, Cellular Assembly and Organization, Cellular Development
37	FNTA, FNTB	1	1	Amino Acid Metabolism, Post-Translational Modification, Small Molecule Biochemistry
38	CSHL1, MAML1	1	1	Gene Expression, Cell Signaling
39	GP2, SYCN	1	1	Cellular Function and Maintenance
40	CBFA2T3, HDAC8, RUNX1T1	1	1	Cellular Development, Hematological System Development and Function, Immune and Lymphatic System Development and Function
41	CTBP1, FOXP1, FOXP2, FOXP4	1	1	Gene Expression, Cardiovascular System Development and Function, Cellular Compromise
	Increased Expression (red)
	Decreased Expression (green)
	Genes present in the Network but not present in our data (black)
